# Supplementary material for: Cyclic Organic Peroxides as New Fungicides against Phytopathogenic Fungi
Source: MDPI journal article supplement (doi:10.3390/agrochemicals2030021), 2023-06-28

# Supporting information

## **Cyclic Organic Peroxides as New Fungicides against Phytopathogenic Fungi**

*Ivan A. Yaremenko,<sup>a</sup> Peter S. Radulov,<sup>a</sup> Yulia Y. Belyakova,<sup>a</sup> Dmitrii I. Fomenkov,<sup>a</sup> Vera A. Vil',<sup>a</sup> Maria A. Kuznetsova,<sup>b</sup> Valentina N. Demidova,<sup>b</sup> Alexei P. Glinushkin,<sup>b</sup> Alexander O. Terent'ev<sup>\*a</sup>*

*<sup>a</sup> N. D. Zelinsky Institute of Organic Chemistry, Russian Academy of Sciences,  
47 Leninsky prosp., 119991 Moscow, Russian Federation  
e-mail, [terentev@ioc.ac.ru](mailto:terentev@ioc.ac.ru)*

*<sup>b</sup> All-Russian Research Institute for Phytopathology, B. Vyazyomy, 143050, Moscow Region, Russian Federation*

# Table of contents

|                                       |    |
|---------------------------------------|----|
| <b>General</b> .....                  | S3 |
| NMR spectra of peroxides P1-P13 ..... | S4 |

## General

**Caution:** Although we have encountered no difficulties in working with the peroxides described below, the proper precautions, such as the use of shields, fume hoods, and the avoidance of transition metal salts, heating and shaking, should be taken whenever possible.

NMR spectra were recorded on a commercial instrument (300.13 MHz for  $^1\text{H}$ , 75.48 MHz for  $^{13}\text{C}$ ) in  $\text{CDCl}_3$ . The TLC analysis was carried out on silica gel chromatography plates Macherey-Nagel Alugram UV254; Sorbent: Silica 60, specific surface (BET)  $\sim 500 \text{ m}^2/\text{g}$ , mean pore size  $60 \text{ \AA}$ , specific pore volume  $0.75 \text{ mL/g}$ , particle size  $5\text{--}17 \text{ }\mu\text{m}$ ; Binder: highly polymeric product stable in almost all organic solvents and resistant towards aggressive visualization reagents. The melting points were determined on a Kofler hot-stage apparatus. Chromatography of 1,3-diketones,  $\beta,\delta'$  – triketones and peroxides was performed on silica gel (0.060-0.200 mm, 60 A, CAS 7631-86-9).

# NMR spectra of peroxides P1-P13

<sup>1</sup>H NMR (300.13 MHz, CDCl<sub>3</sub>). 4-*tert*-Butyl-1,1-dihydroperoxycyclohexane P1

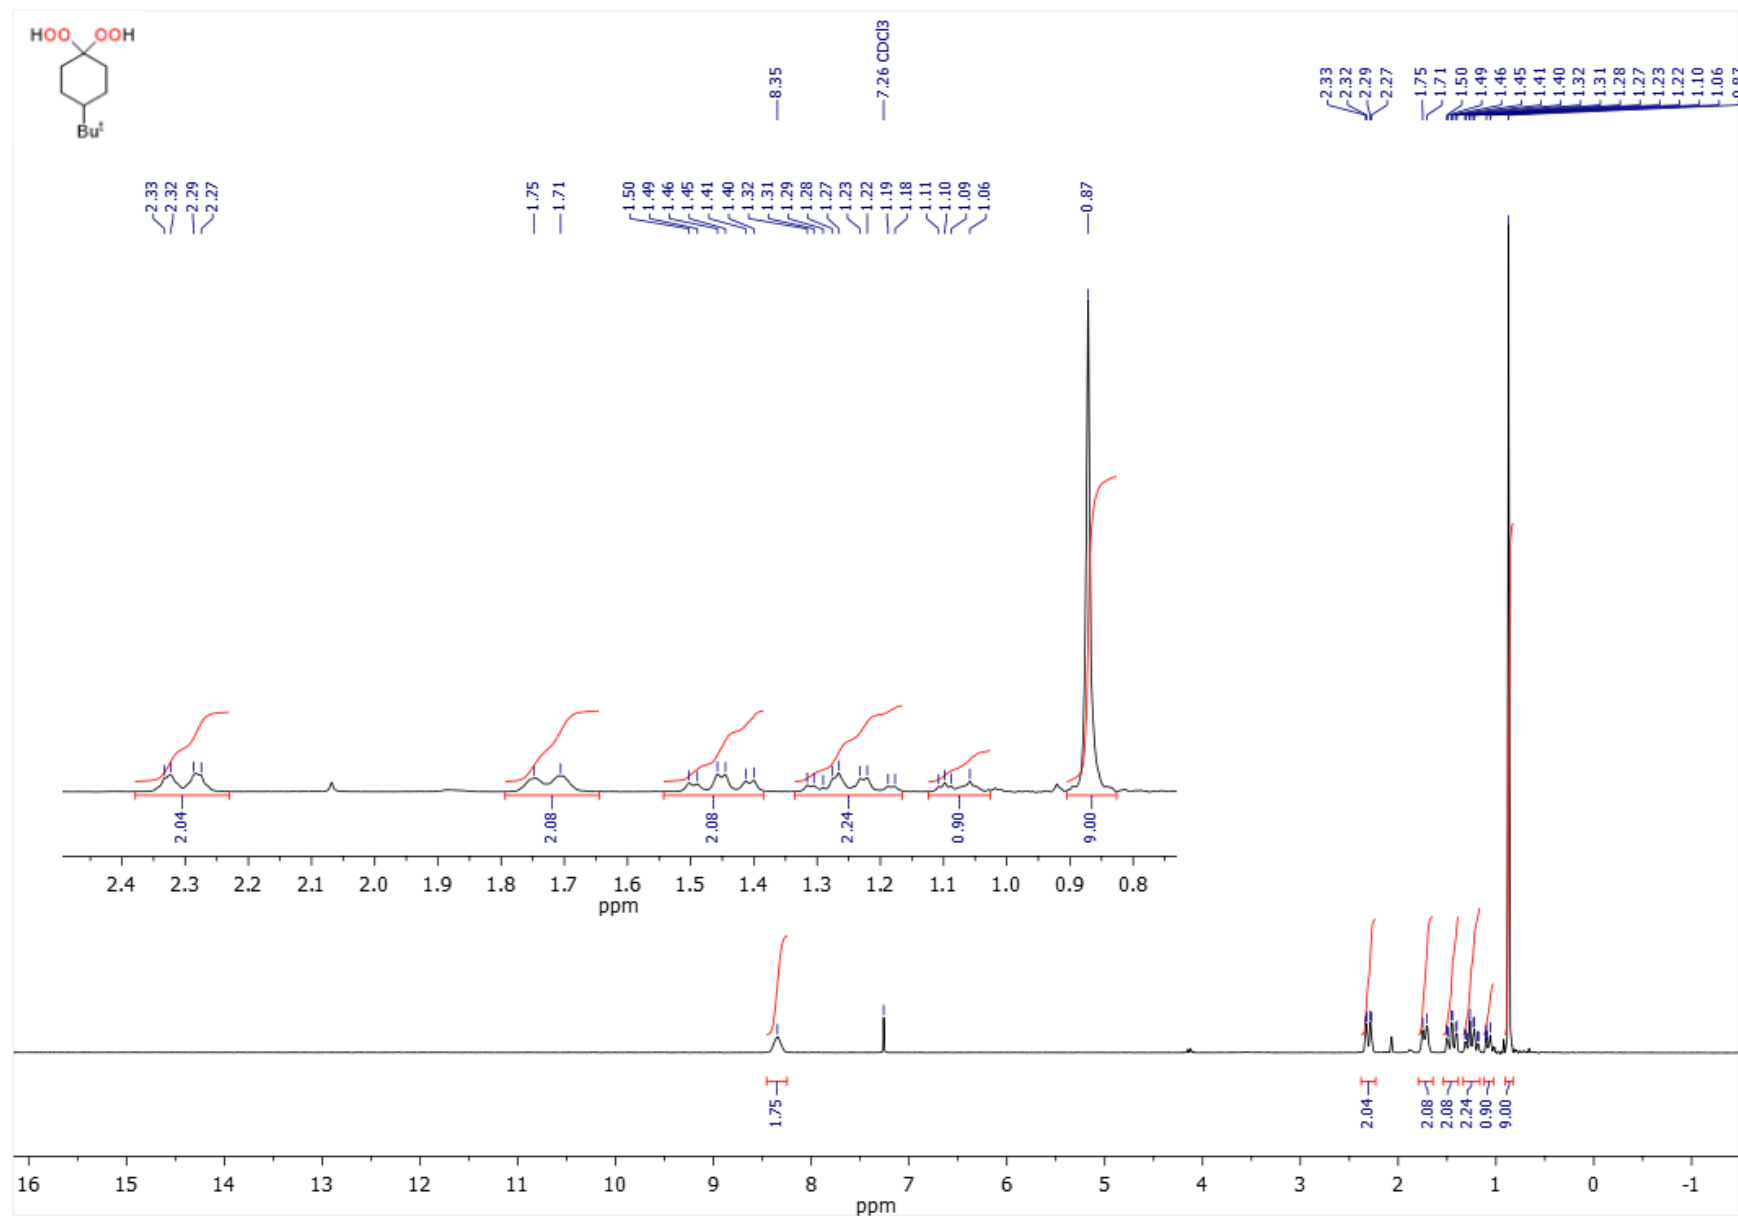

<sup>13</sup>C NMR (75.48 MHz, CDCl<sub>3</sub>). 4-*tert*-Butyl-1,1-dihydroperoxycyclohexane P1

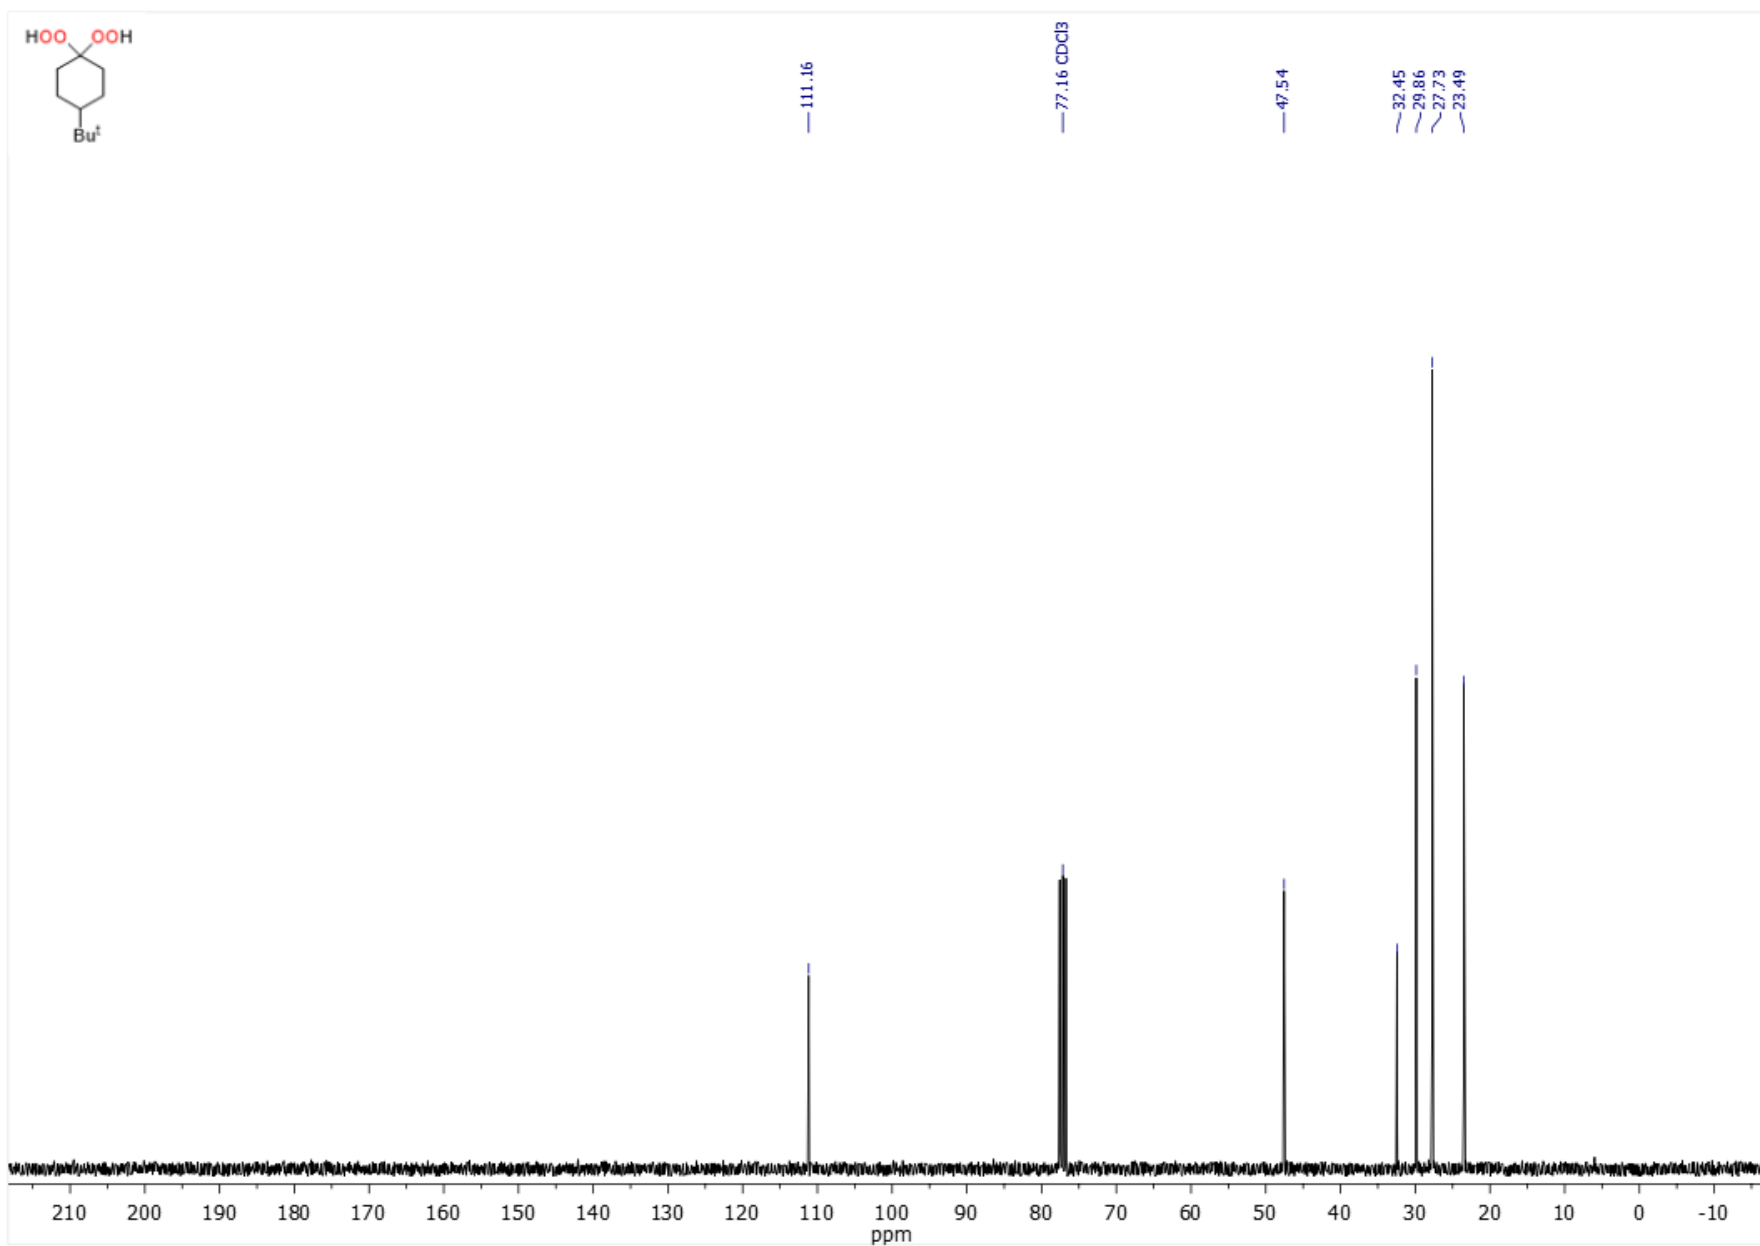

$^1\text{H}$  NMR (300.13 MHz,  $\text{CDCl}_3$ ). 7-Butyl-1,4-dimethyl-2,3,5,6-tetraoxabicyclo[2.2.1]heptane, P2

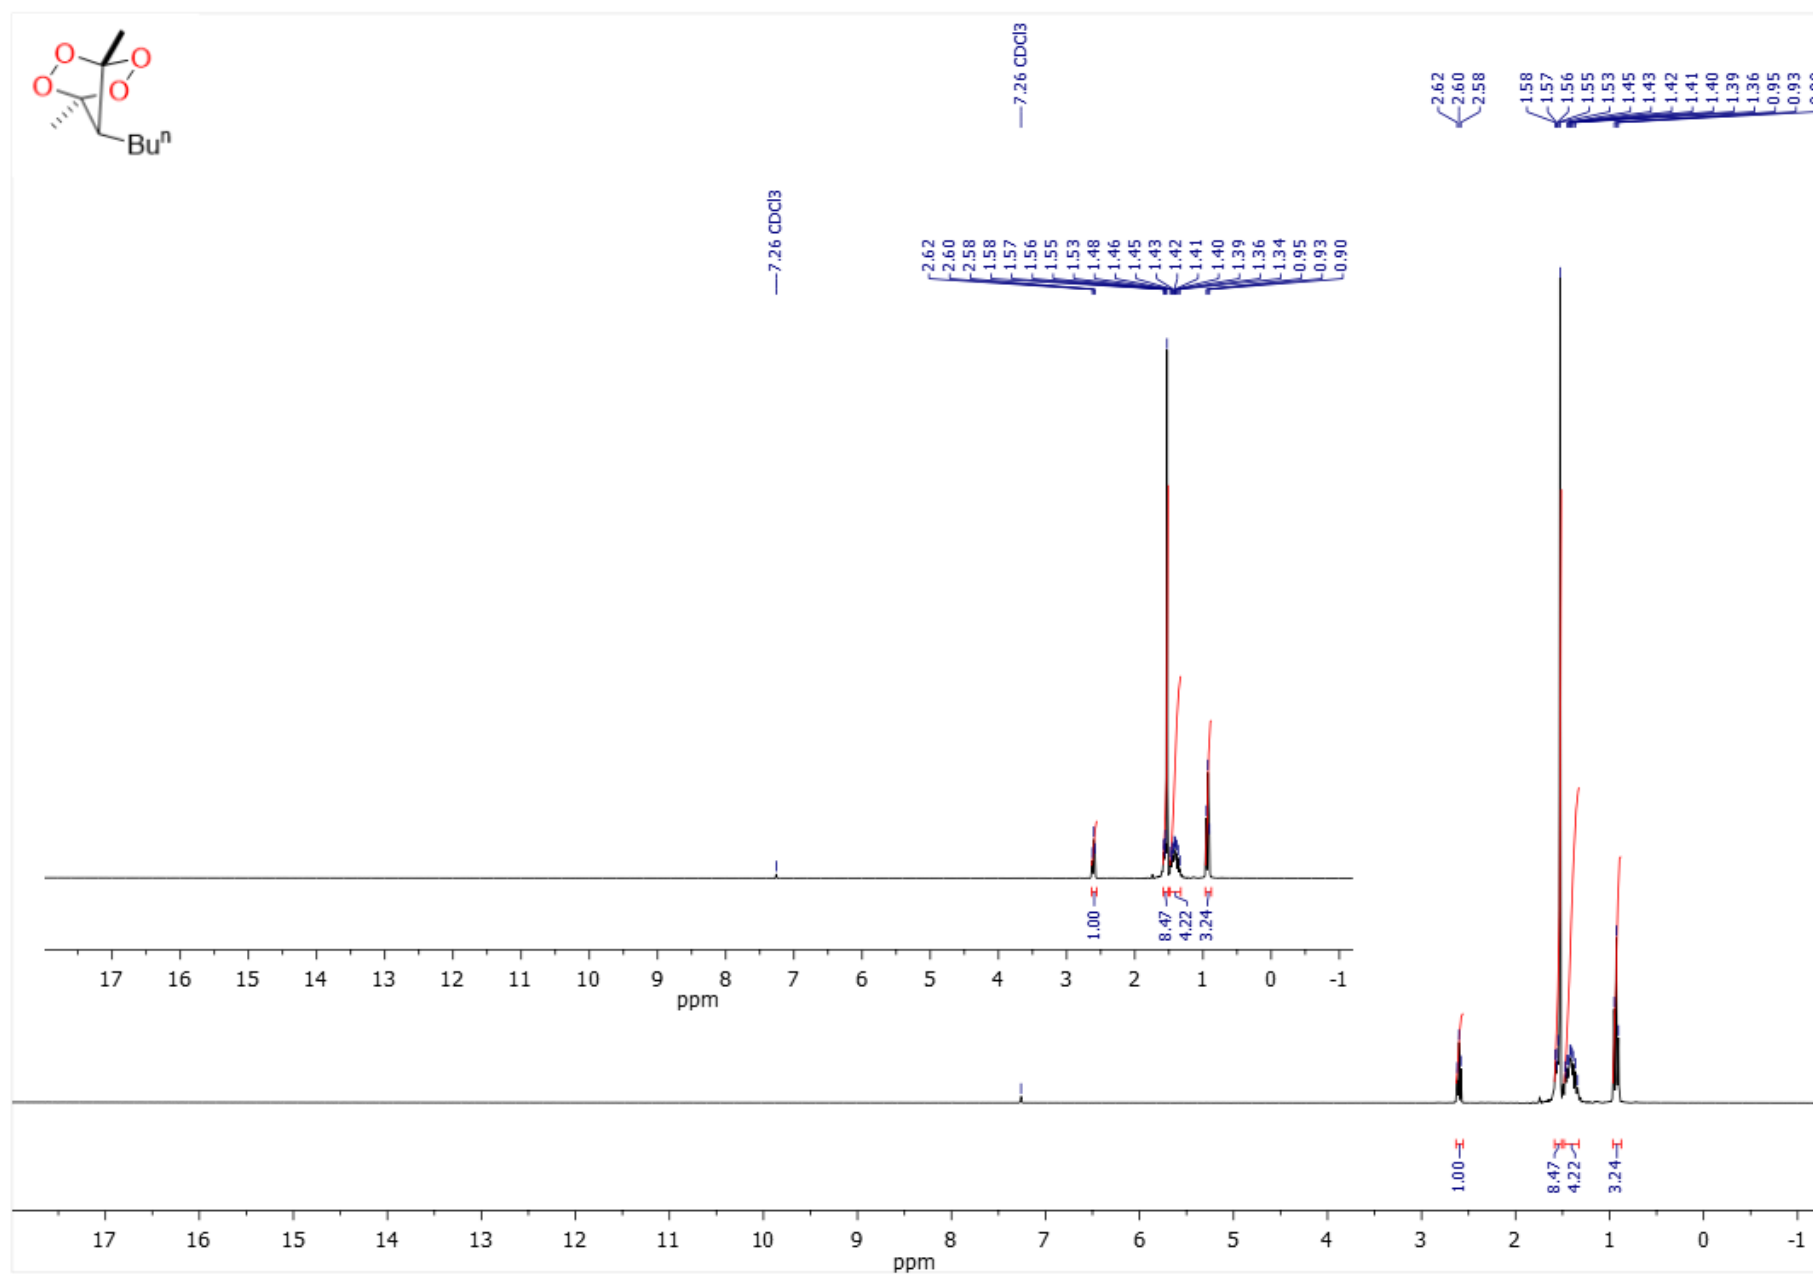

$^{13}\text{C}$  NMR (75.48 MHz,  $\text{CDCl}_3$ ). 7-Butyl-1,4-dimethyl-2,3,5,6-tetraoxabicyclo[2.2.1]heptane, P2

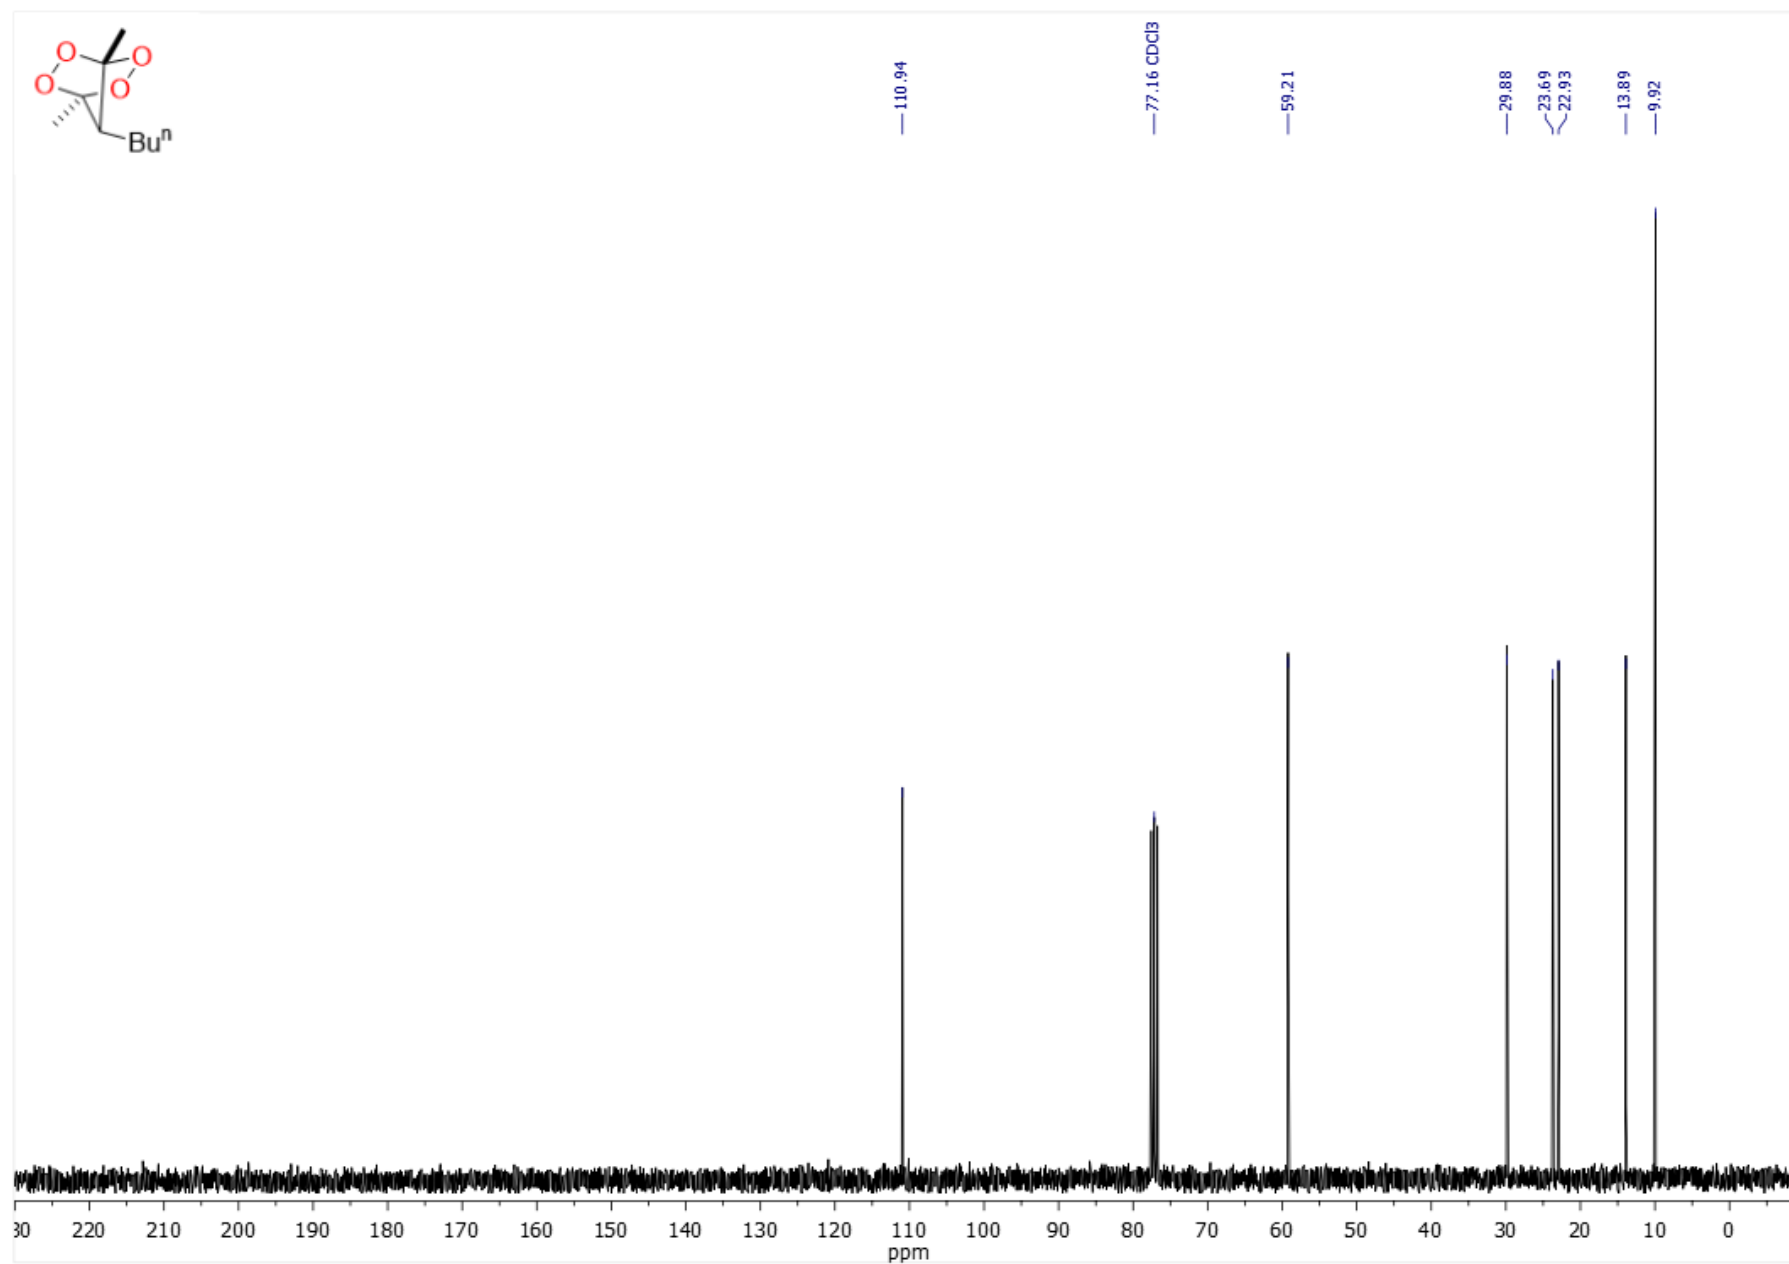

<sup>1</sup>H NMR (300.13 MHz, CDCl<sub>3</sub>). 7-Isopentyl-1,4-dimethyl-2,3,5,6-tetraoxabicyclo[2.2.1]heptane, P3

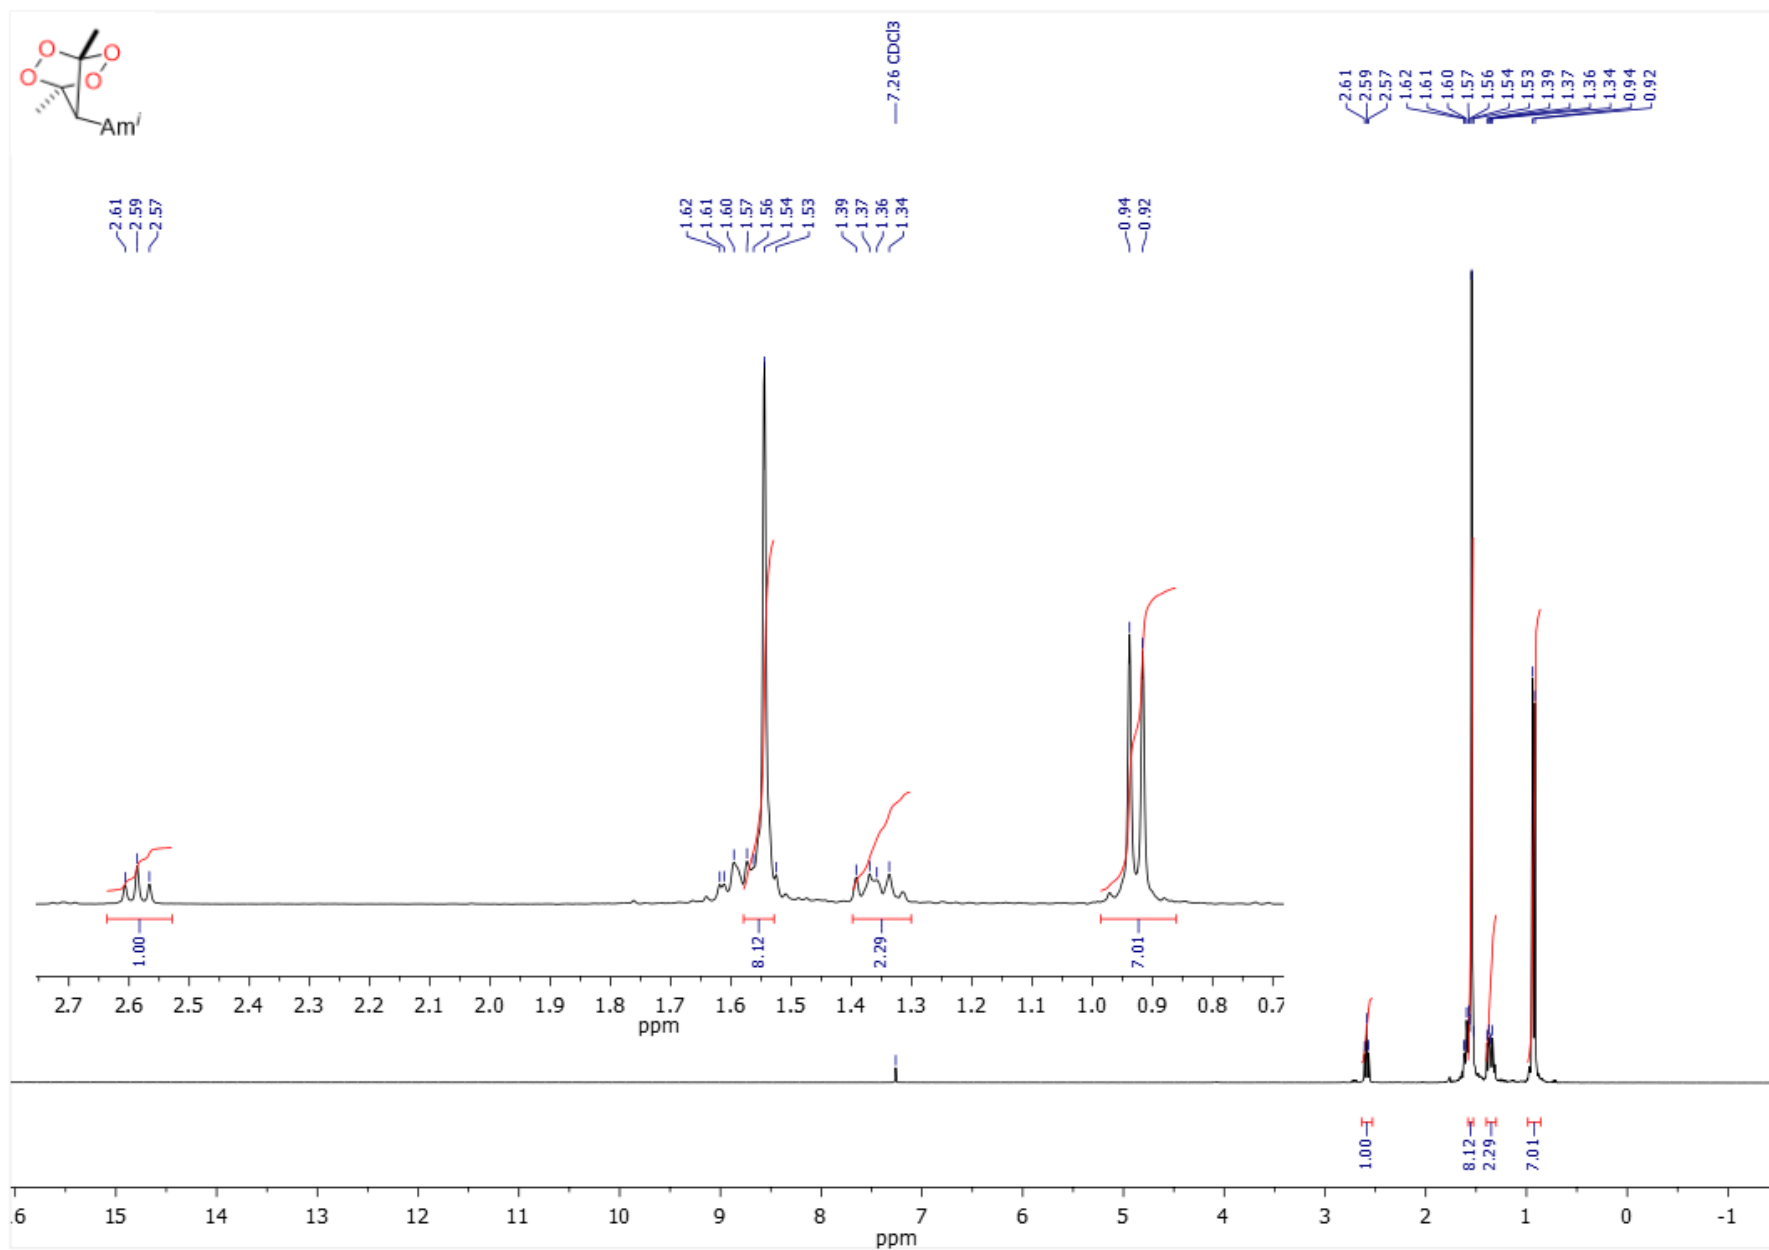



<sup>13</sup>C NMR (75.48 MHz, CDCl<sub>3</sub>). 7-Isopentyl-1,4-dimethyl-2,3,5,6-tetraoxabicyclo[2.2.1]heptane, P3

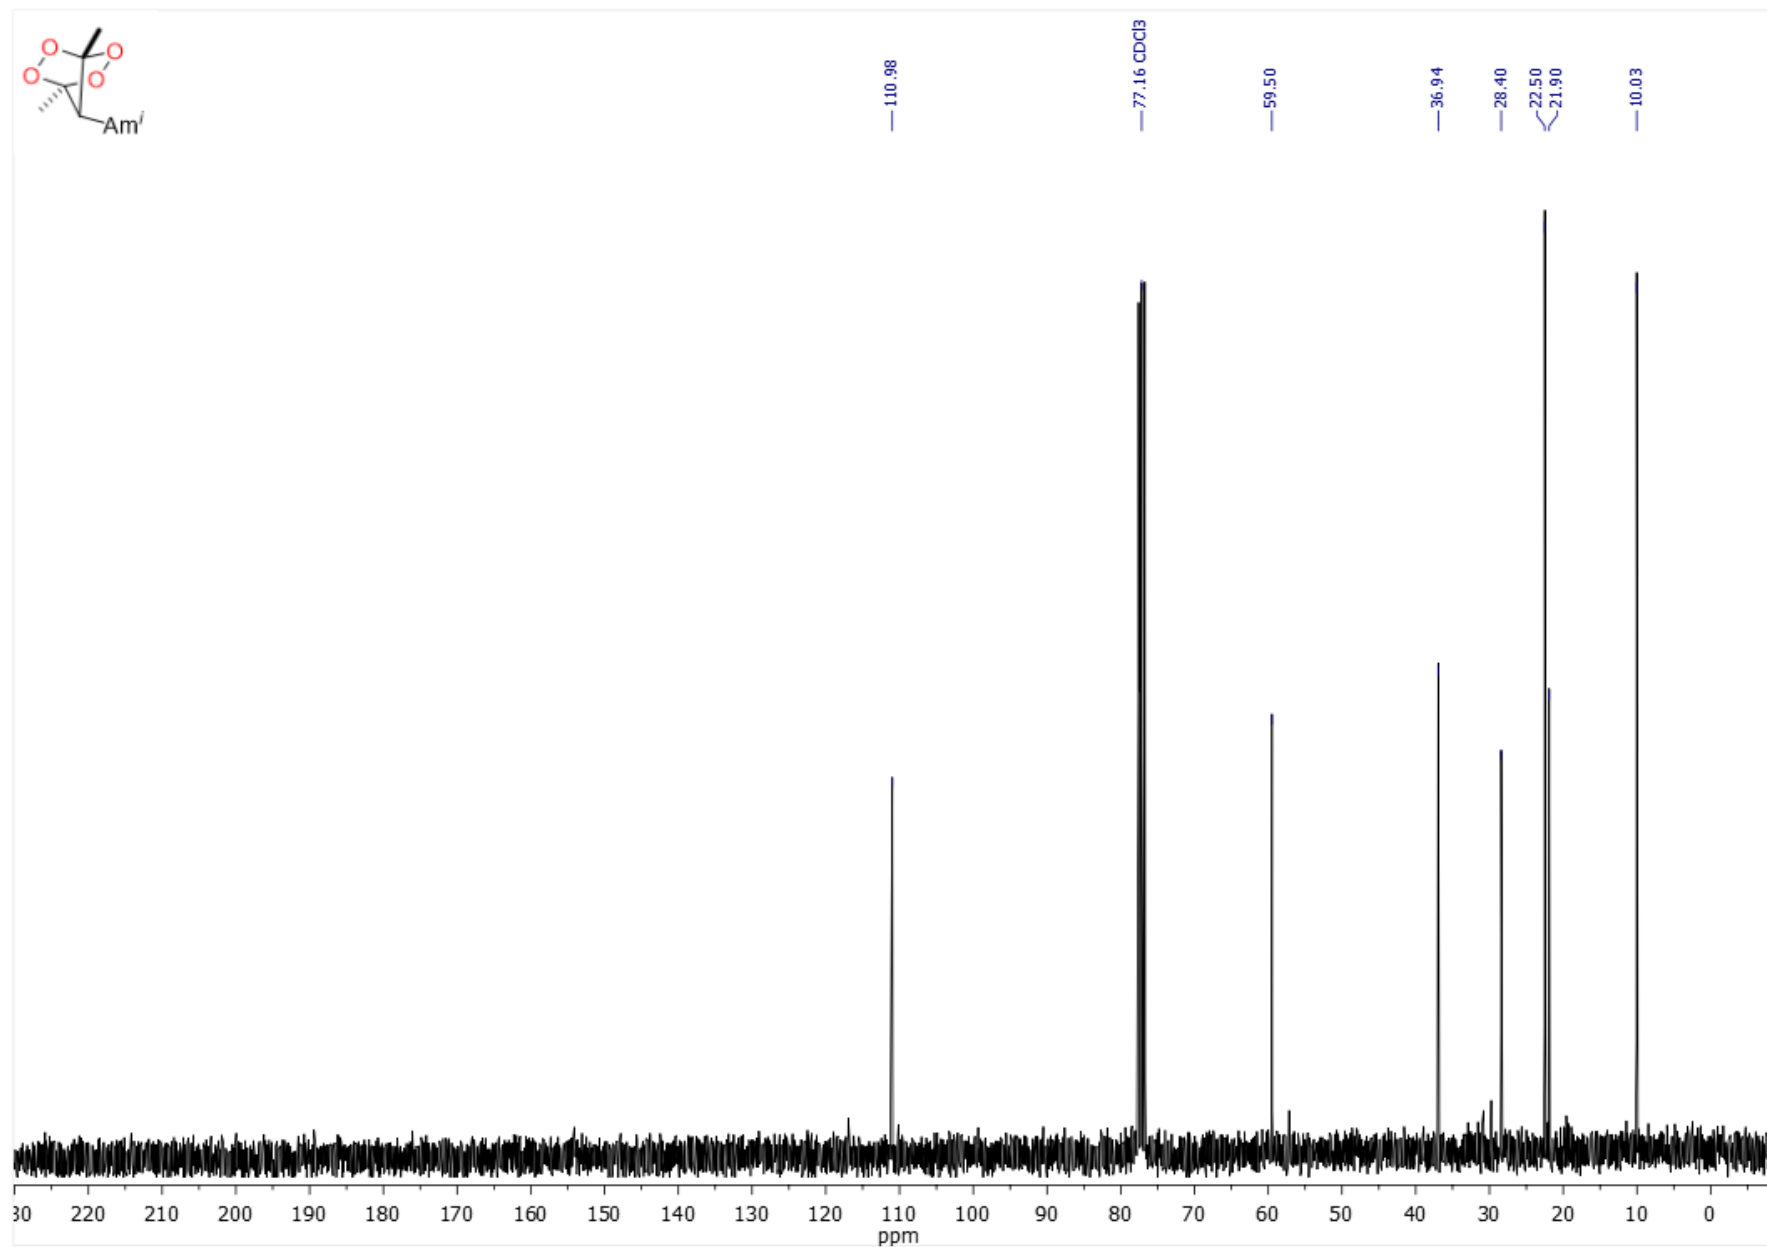

<sup>1</sup>H NMR (300.13 MHz, CDCl<sub>3</sub>). 7-Hexyl-1,4-dimethyl-2,3,5,6-tetraoxabicyclo[2.2.1]heptane, P4

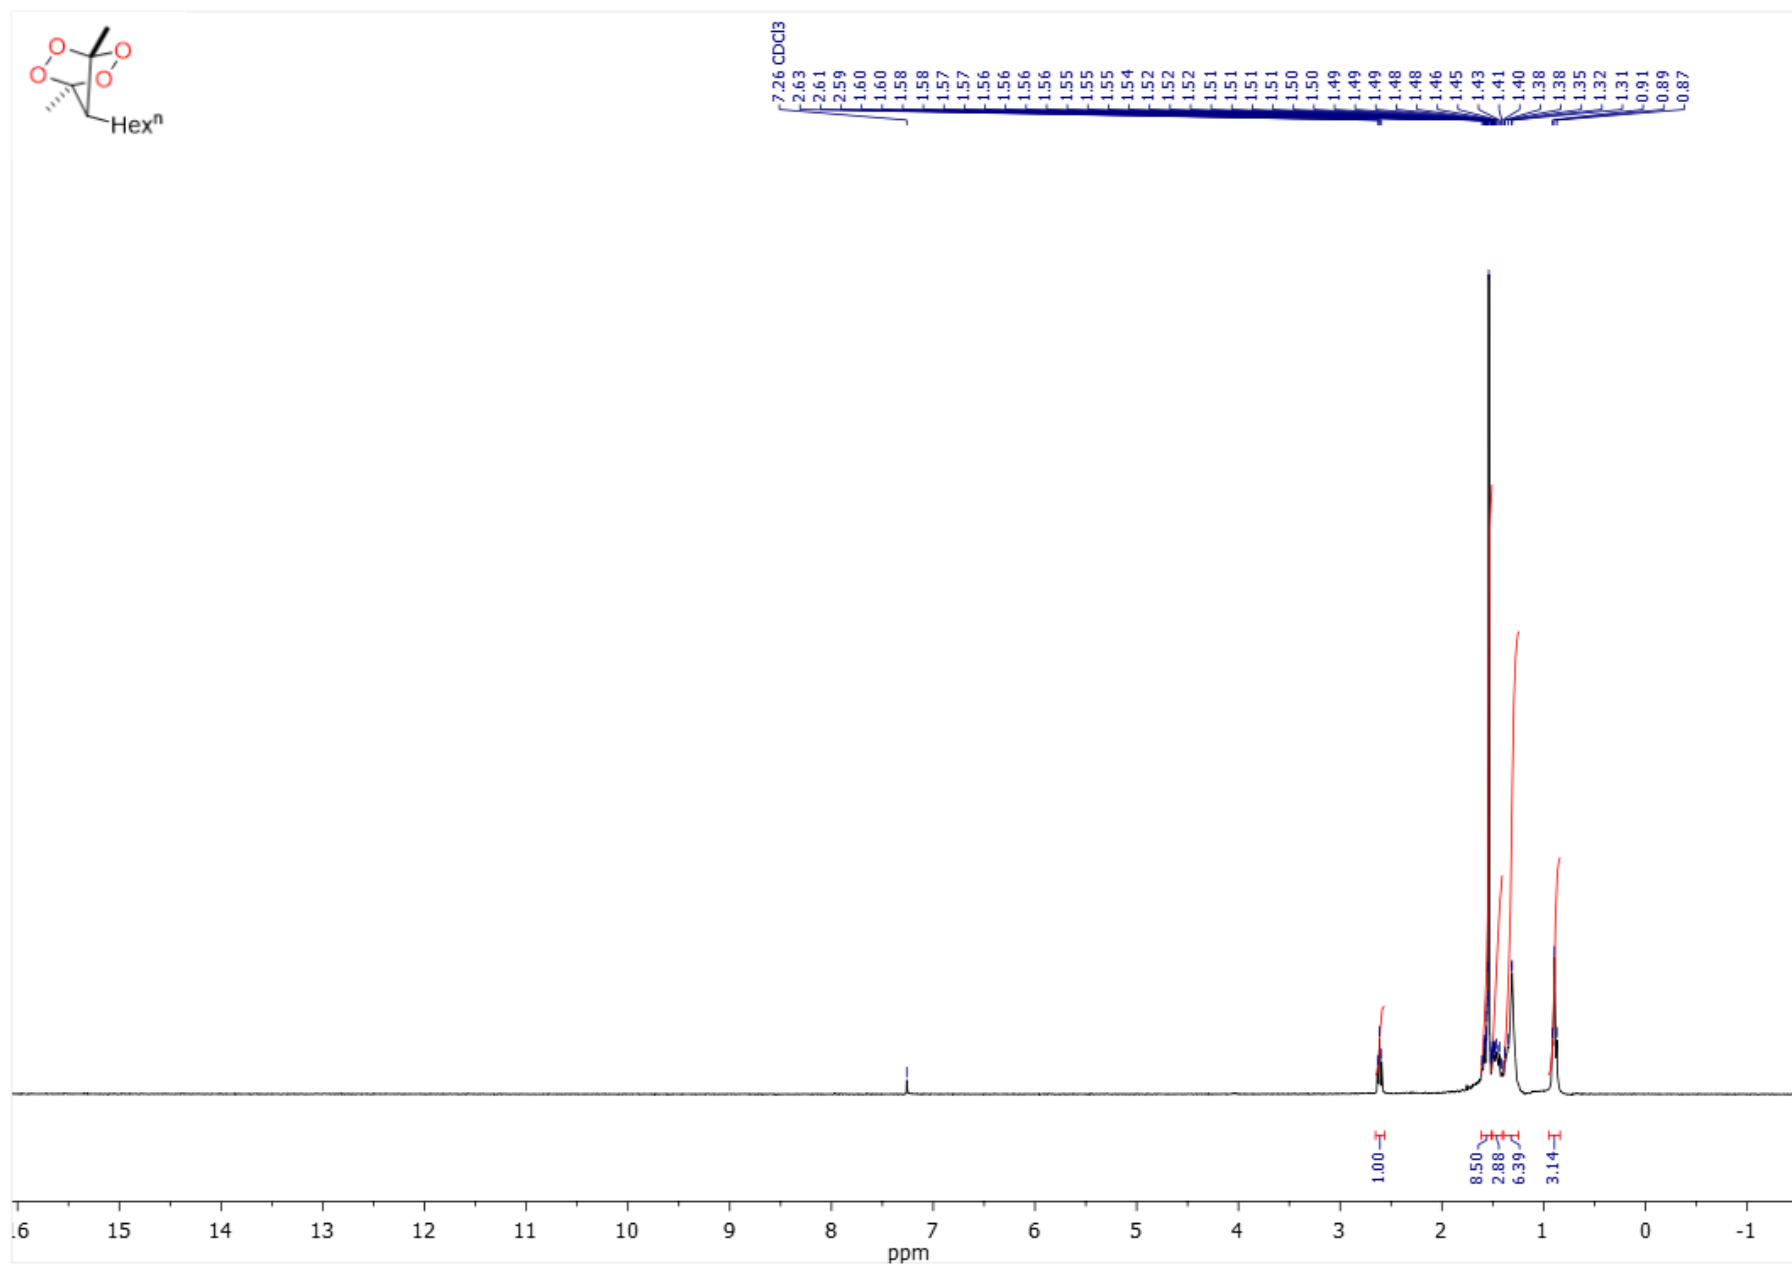

<sup>13</sup>C NMR (75.48 MHz, CDCl<sub>3</sub>). 7-Hexyl-1,4-dimethyl-2,3,5,6-tetraoxabicyclo[2.2.1]heptane, P4

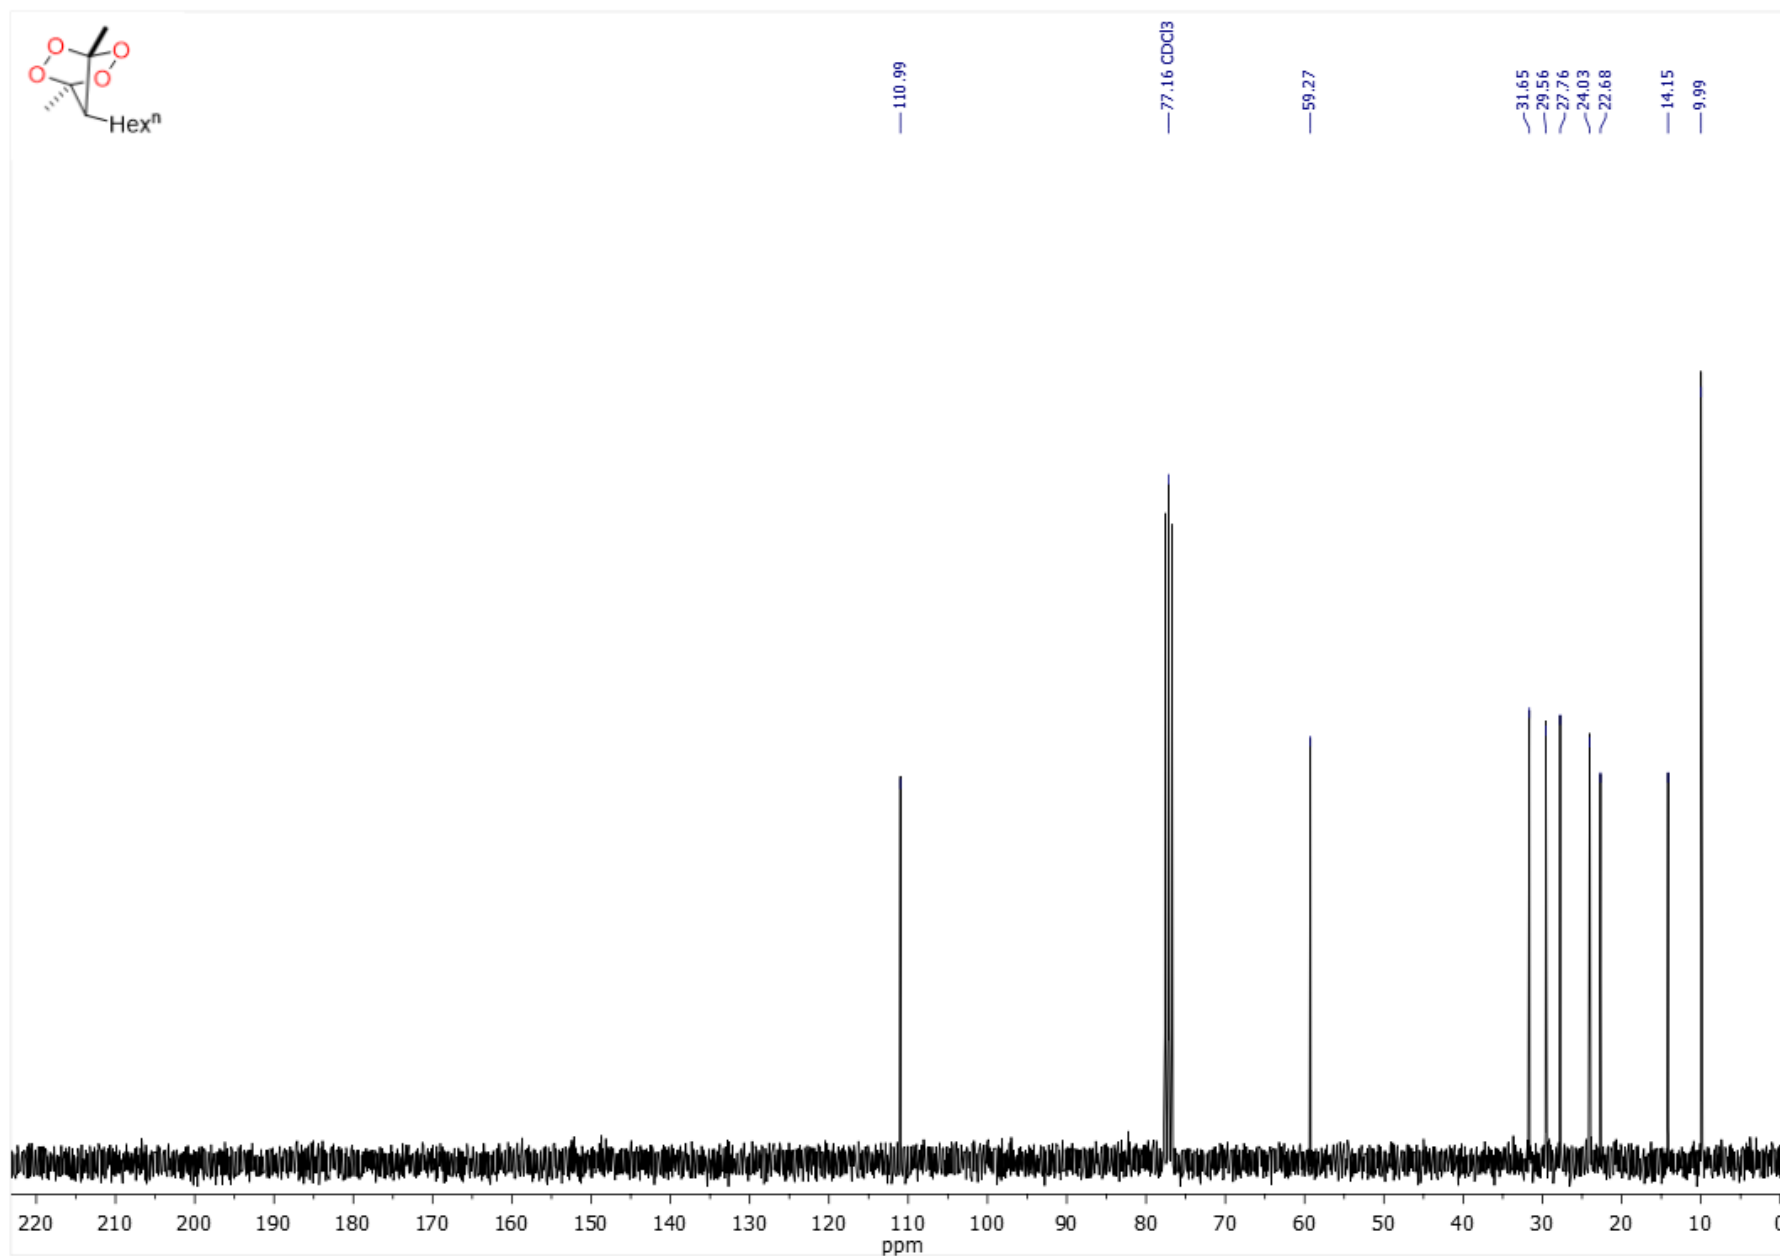

<sup>1</sup>H NMR (300.13 MHz, CDCl<sub>3</sub>). 1,4-Dimethyl-7-octyl-2,3,5,6-tetraoxabicyclo[2.2.1]heptane, P5

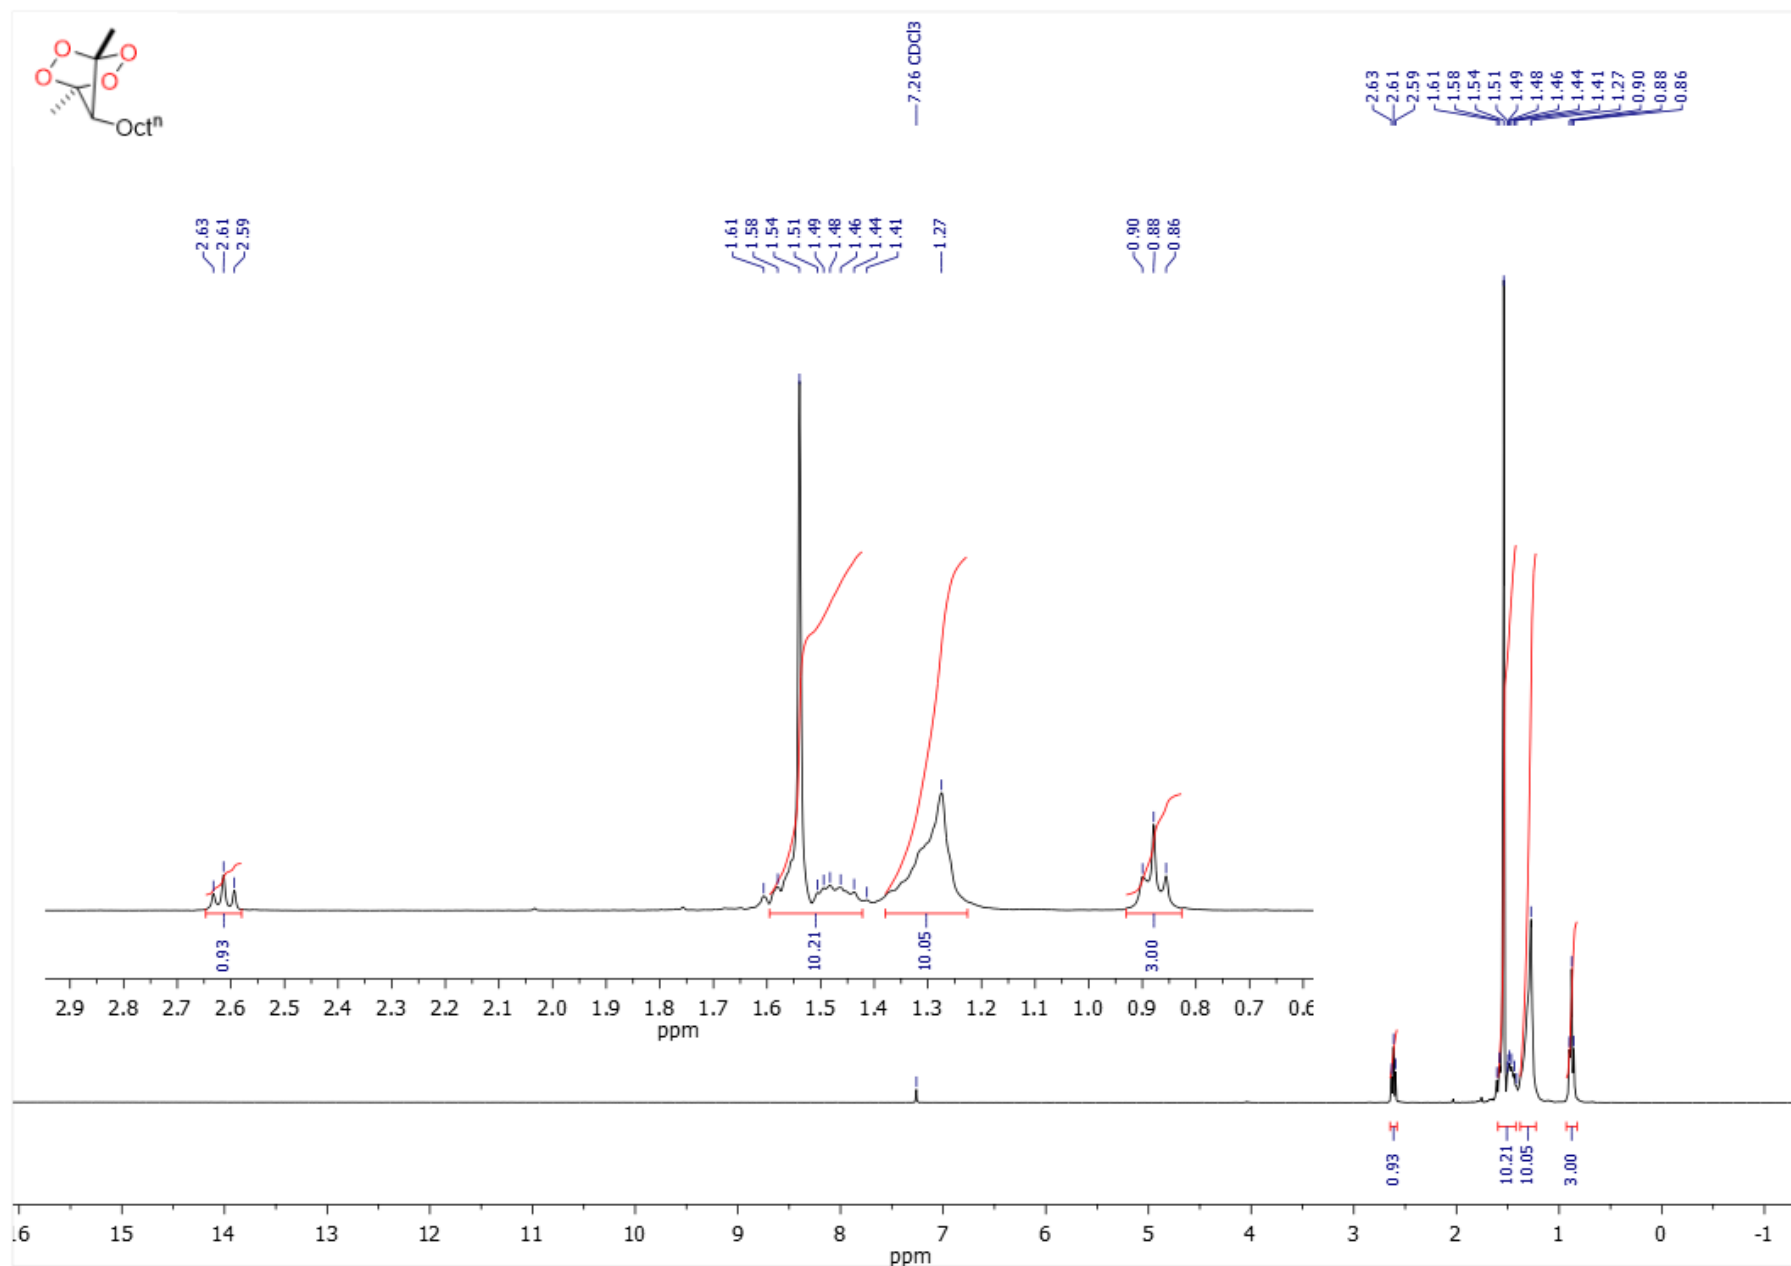

<sup>13</sup>C NMR (75.48 MHz, CDCl<sub>3</sub>). 1,4-Dimethyl-7-octyl-2,3,5,6-tetraoxabicyclo[2.2.1]heptane, P5

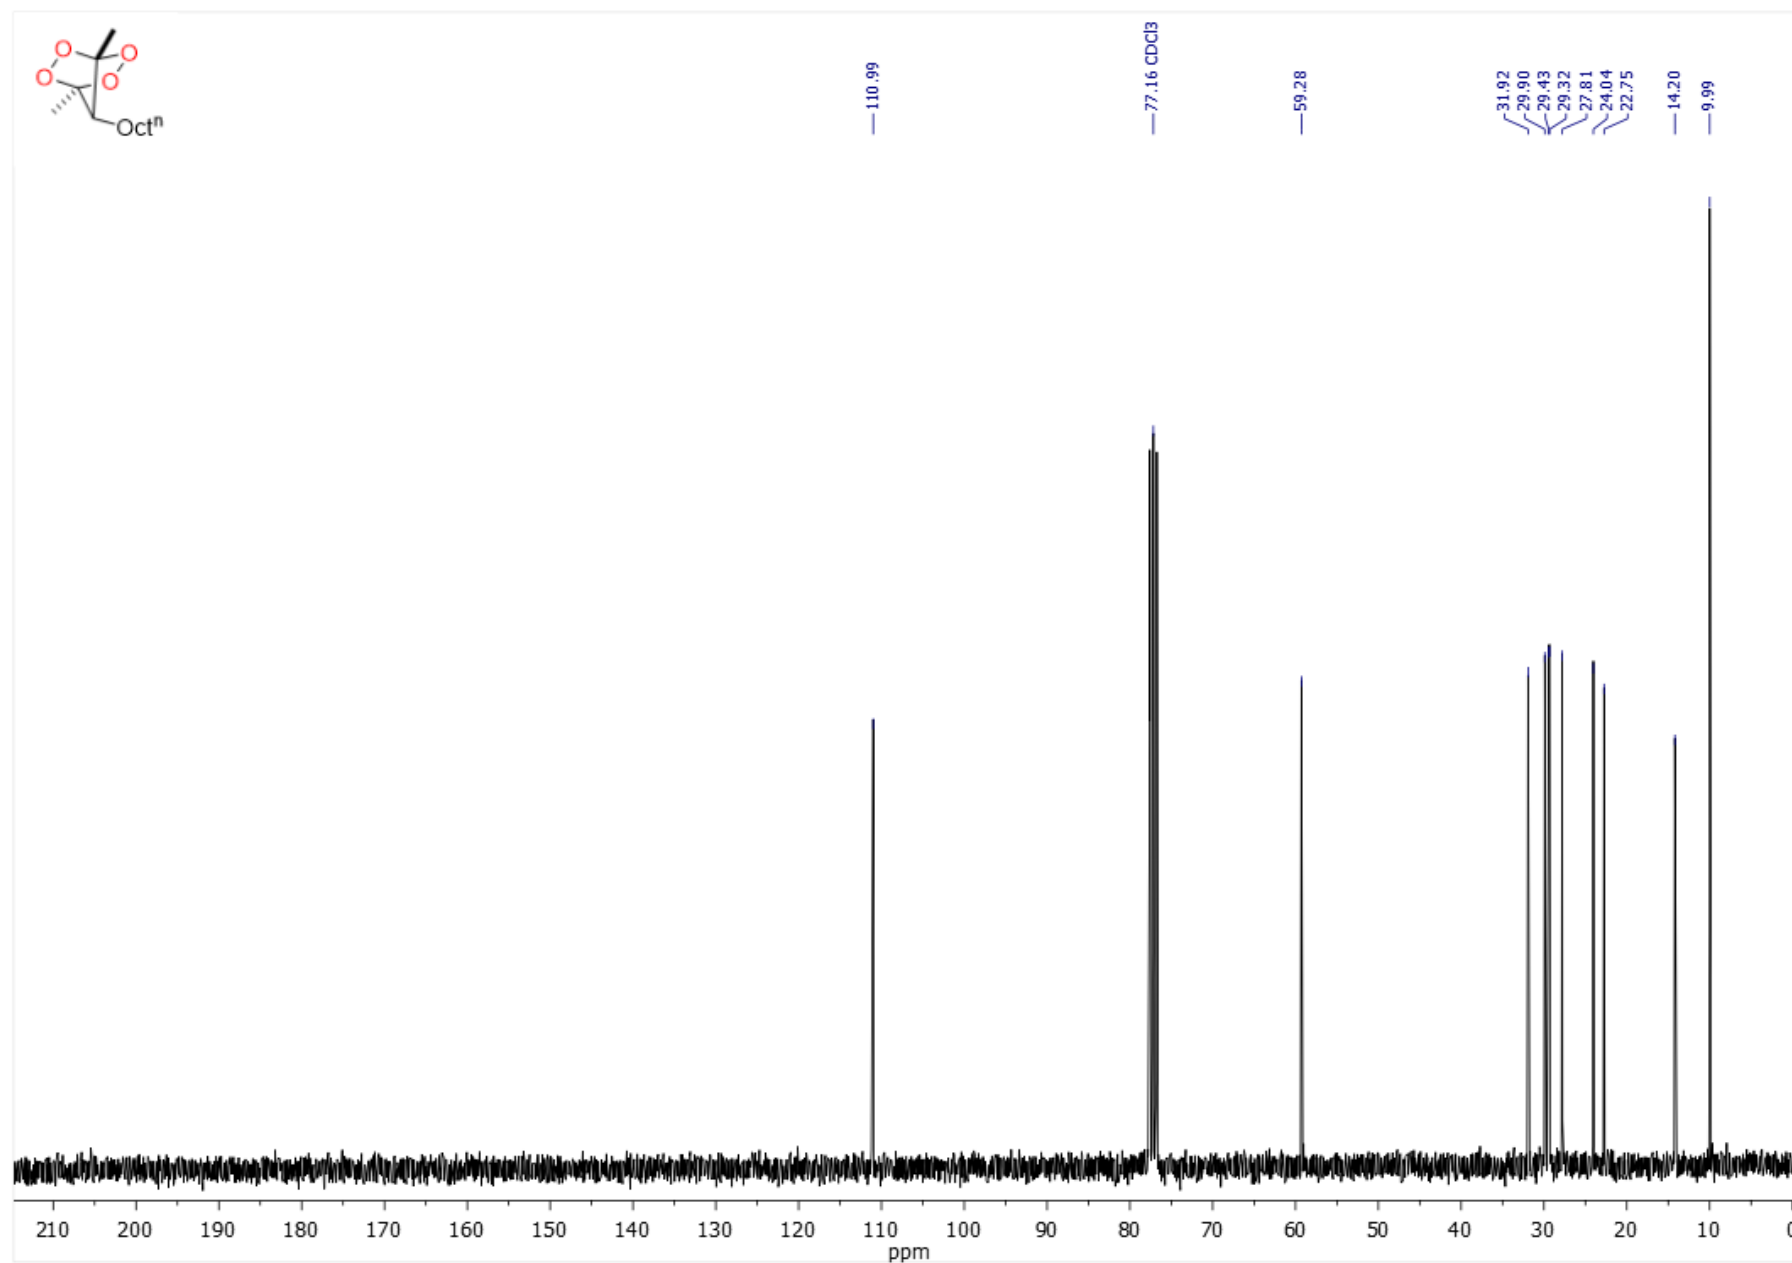

<sup>1</sup>H NMR (300.13 MHz, CDCl<sub>3</sub>). Ethyl 3-(1,4-dimethyl-2,3,5,6-tetraoxabicyclo[2.2.1]heptan-7-yl)propanoate, P6

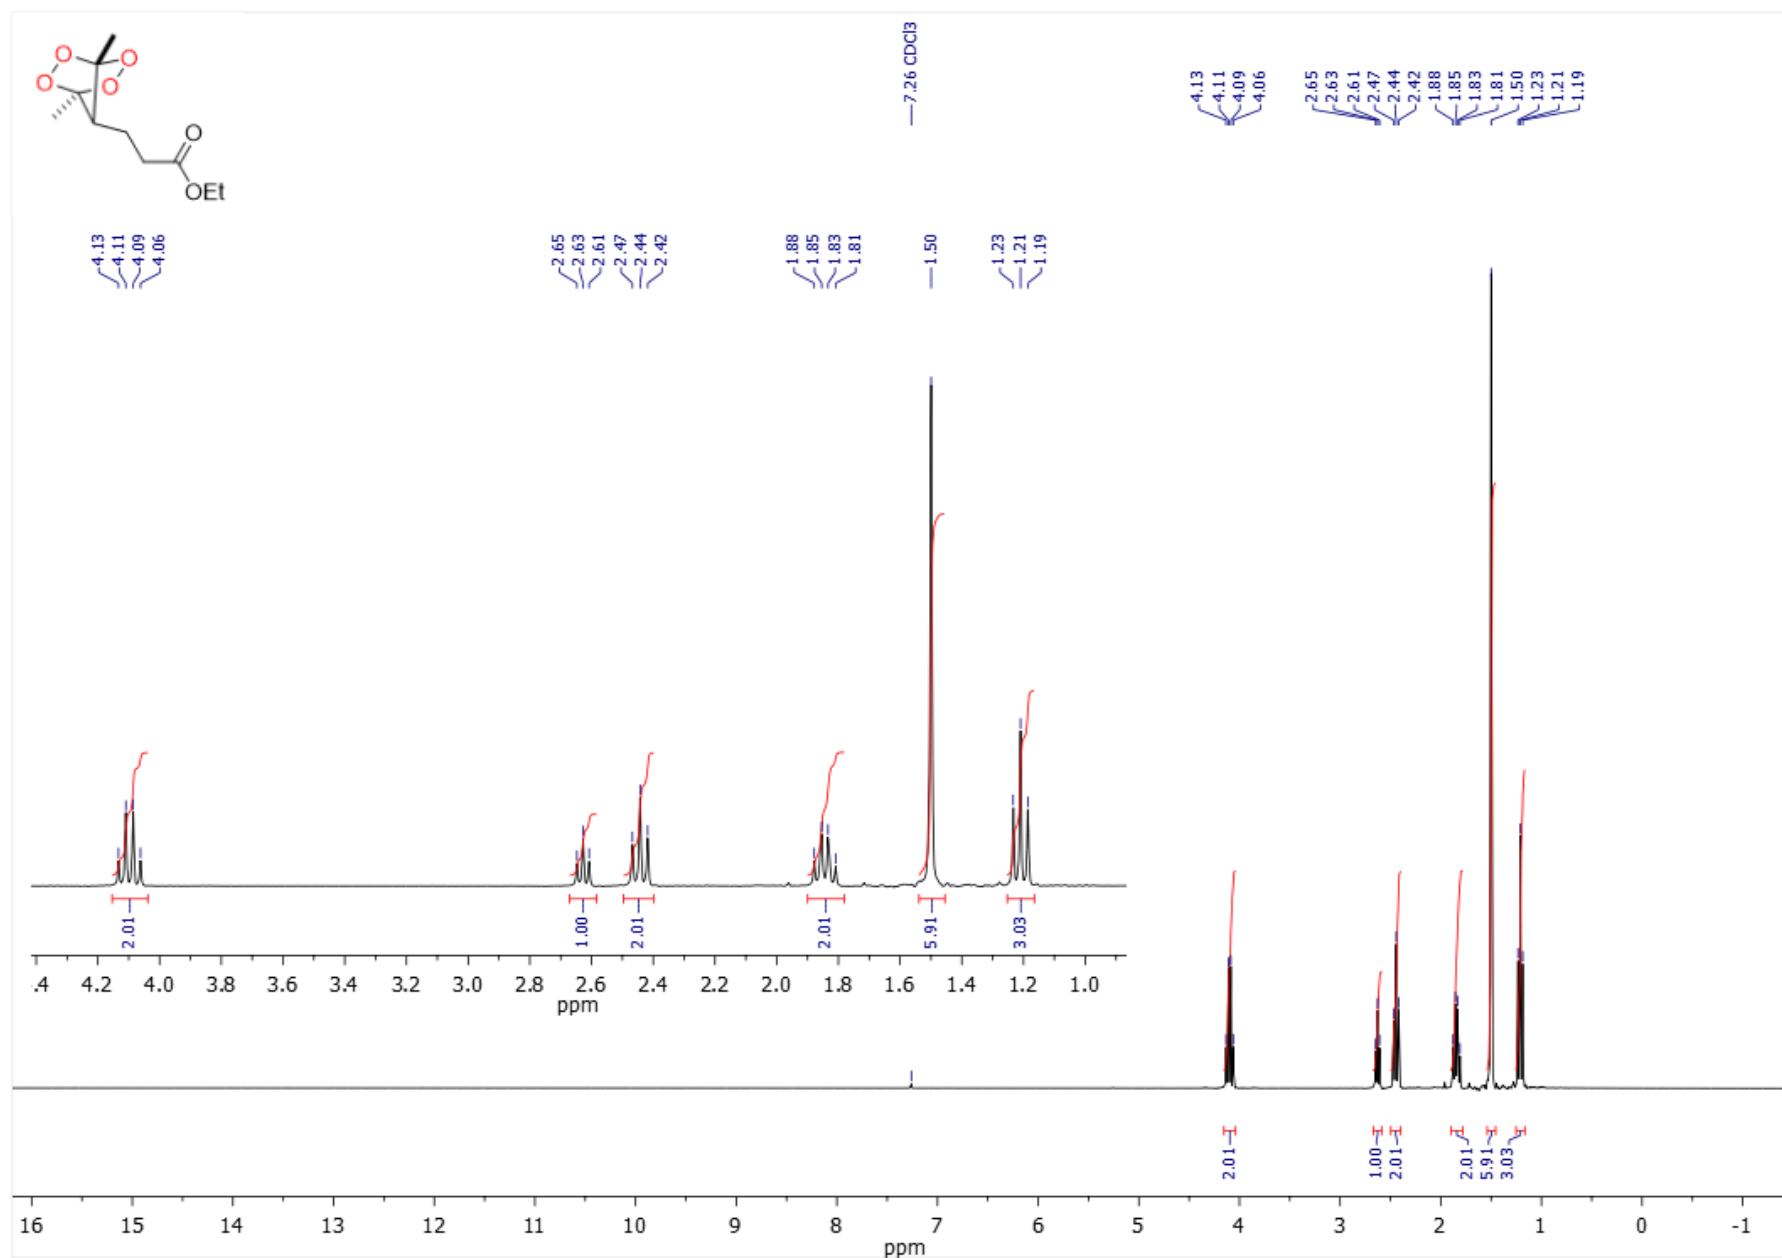

<sup>13</sup>C NMR (75.48 MHz, CDCl<sub>3</sub>). Ethyl 3-(1,4-dimethyl-2,3,5,6-tetraoxabicyclo[2.2.1]heptan-7-yl)propanoate, P6

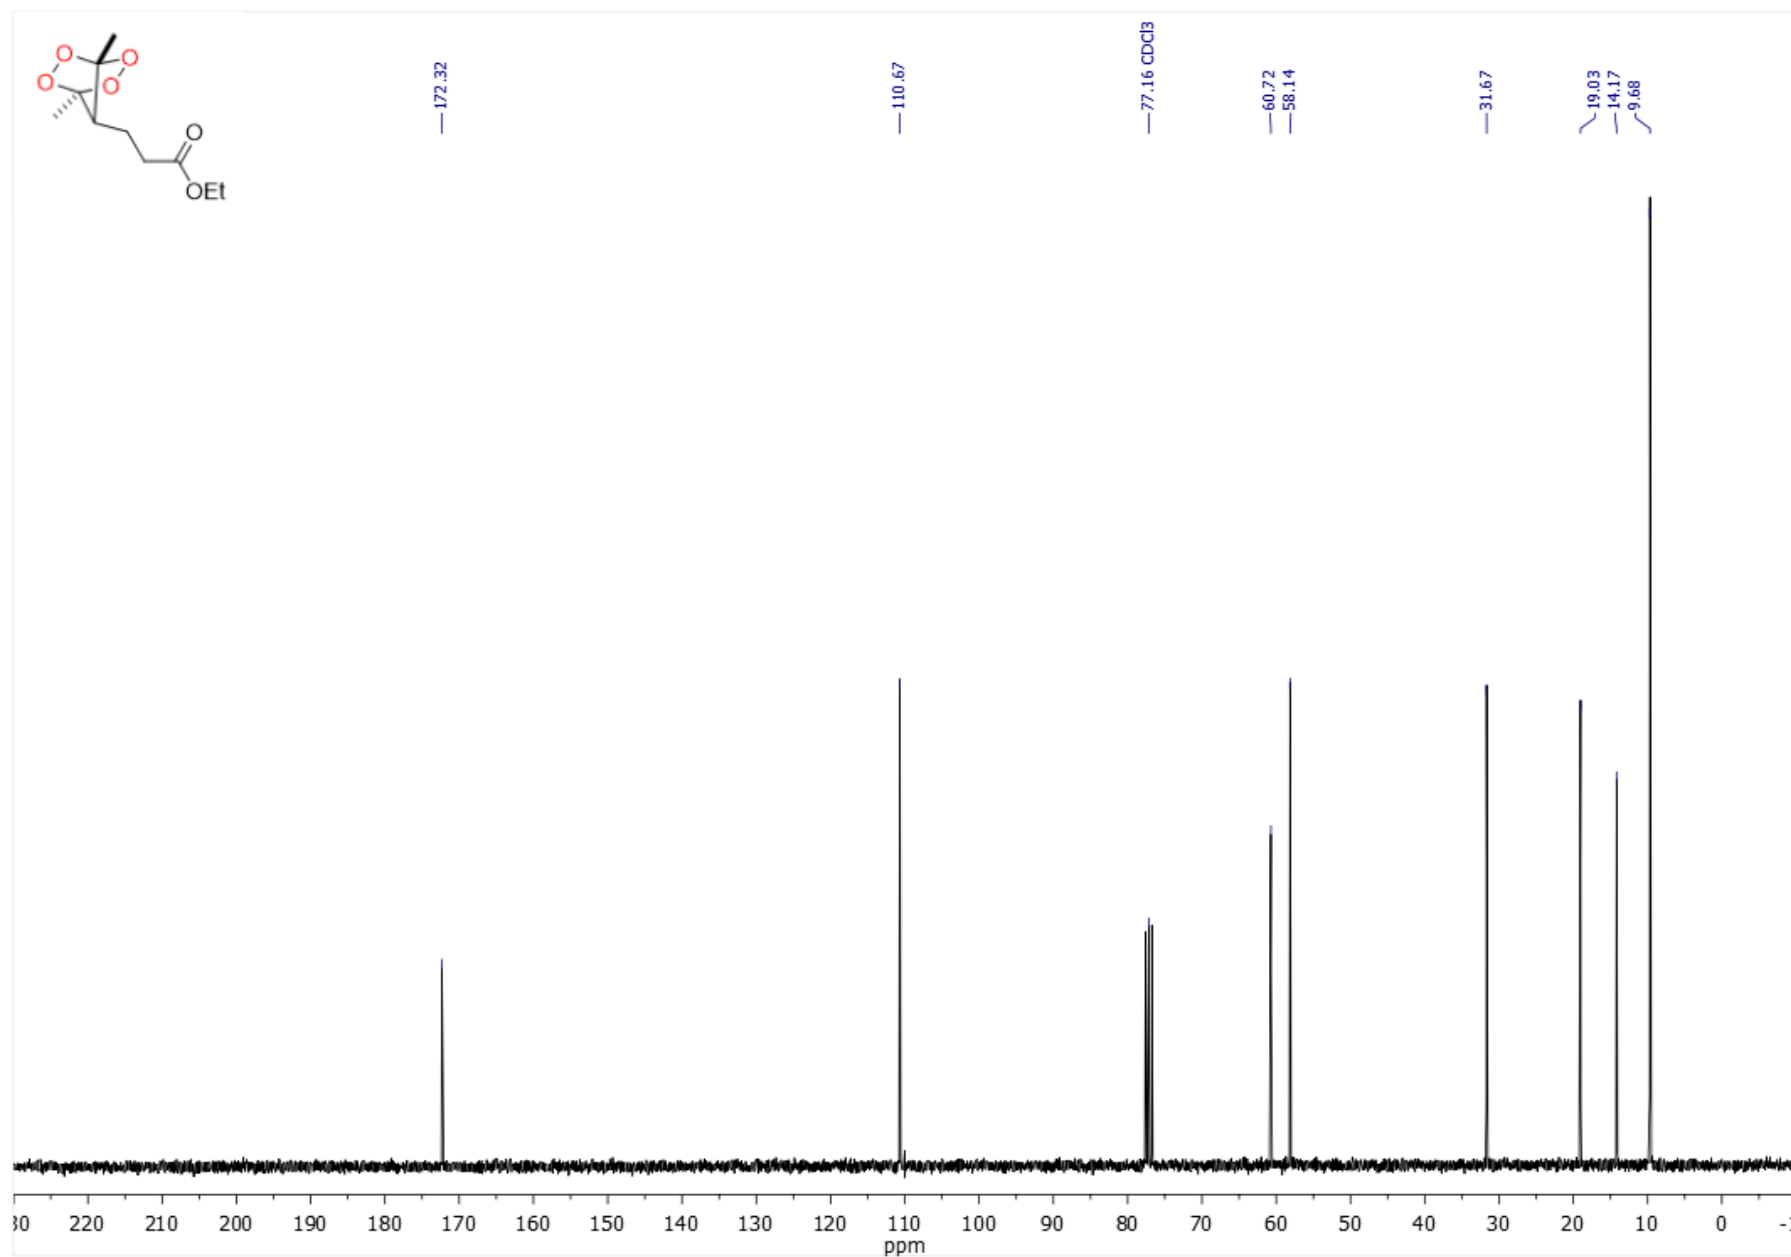

<sup>1</sup>H NMR (300.13 MHz, CDCl<sub>3</sub>). 7-(Adamantan-1-yl)-1,4-dimethyl-2,3,5,6-tetraoxabicyclo[2.2.1]heptane, P7

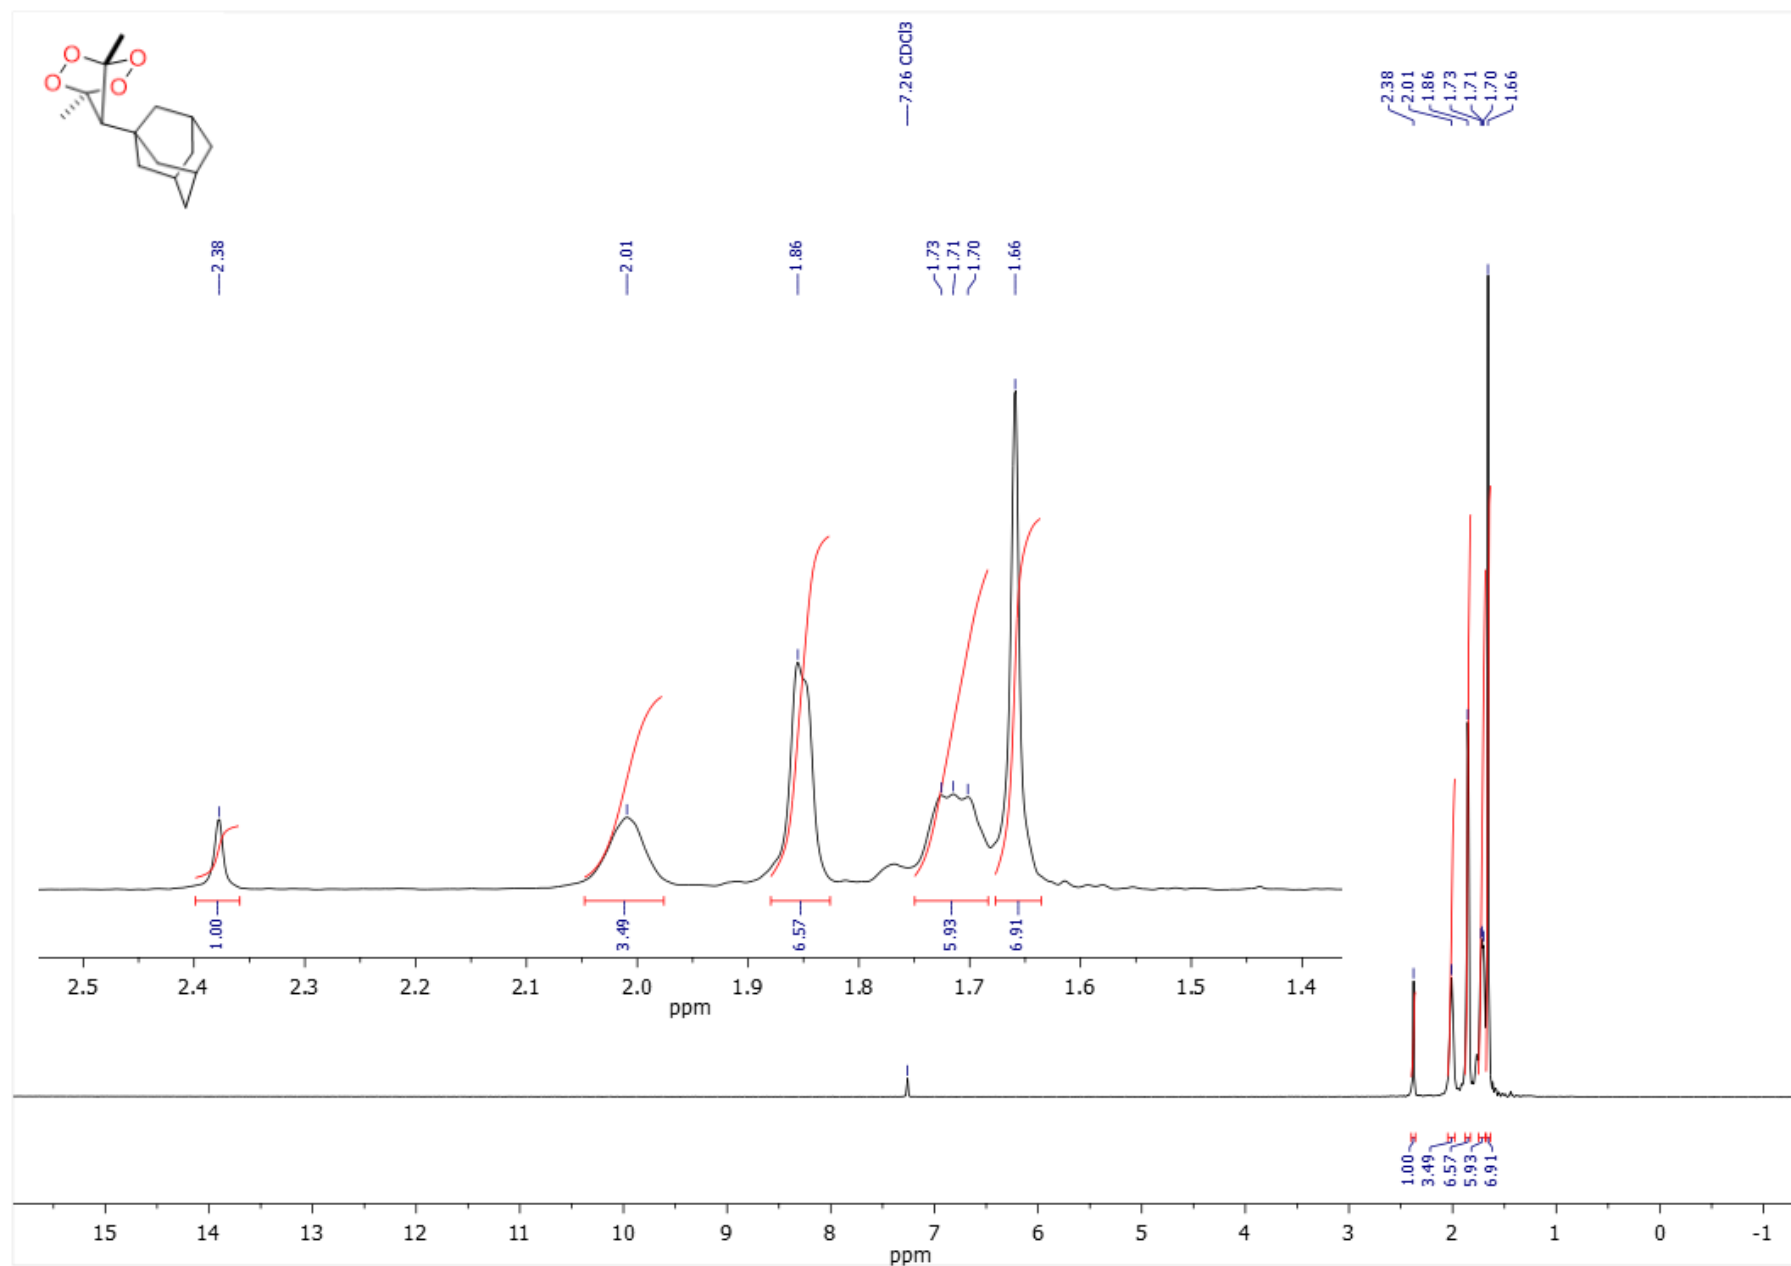



<sup>13</sup>C NMR (75.48 MHz, CDCl<sub>3</sub>). 7-(Adamantan-1-yl)-1,4-dimethyl-2,3,5,6-tetraoxabicyclo[2.2.1]heptane, P7

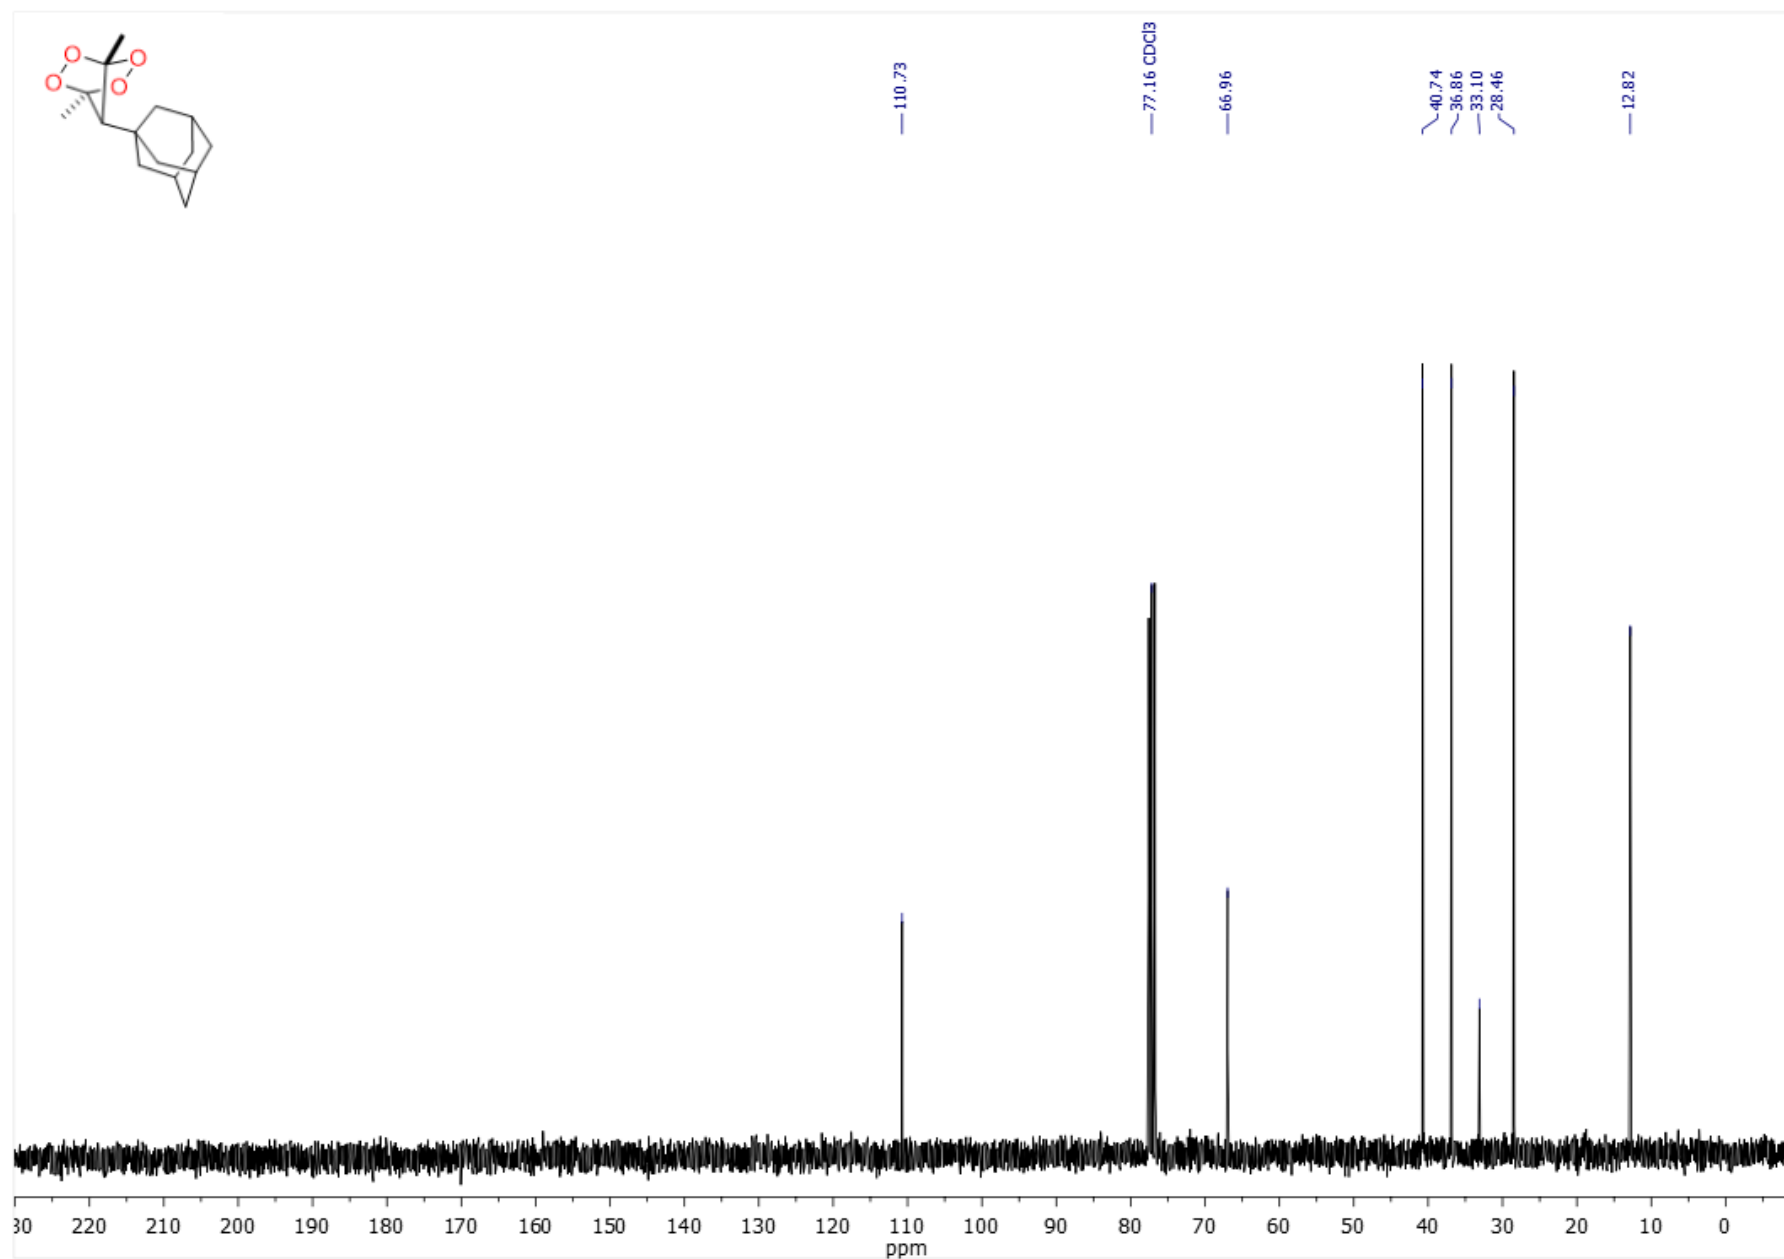

<sup>1</sup>H NMR (300.13 MHz, CDCl<sub>3</sub>). 7-benzyl-1,4-dimethyl-2,3,5,6-tetraoxabicyclo[2.2.1]heptane, P8

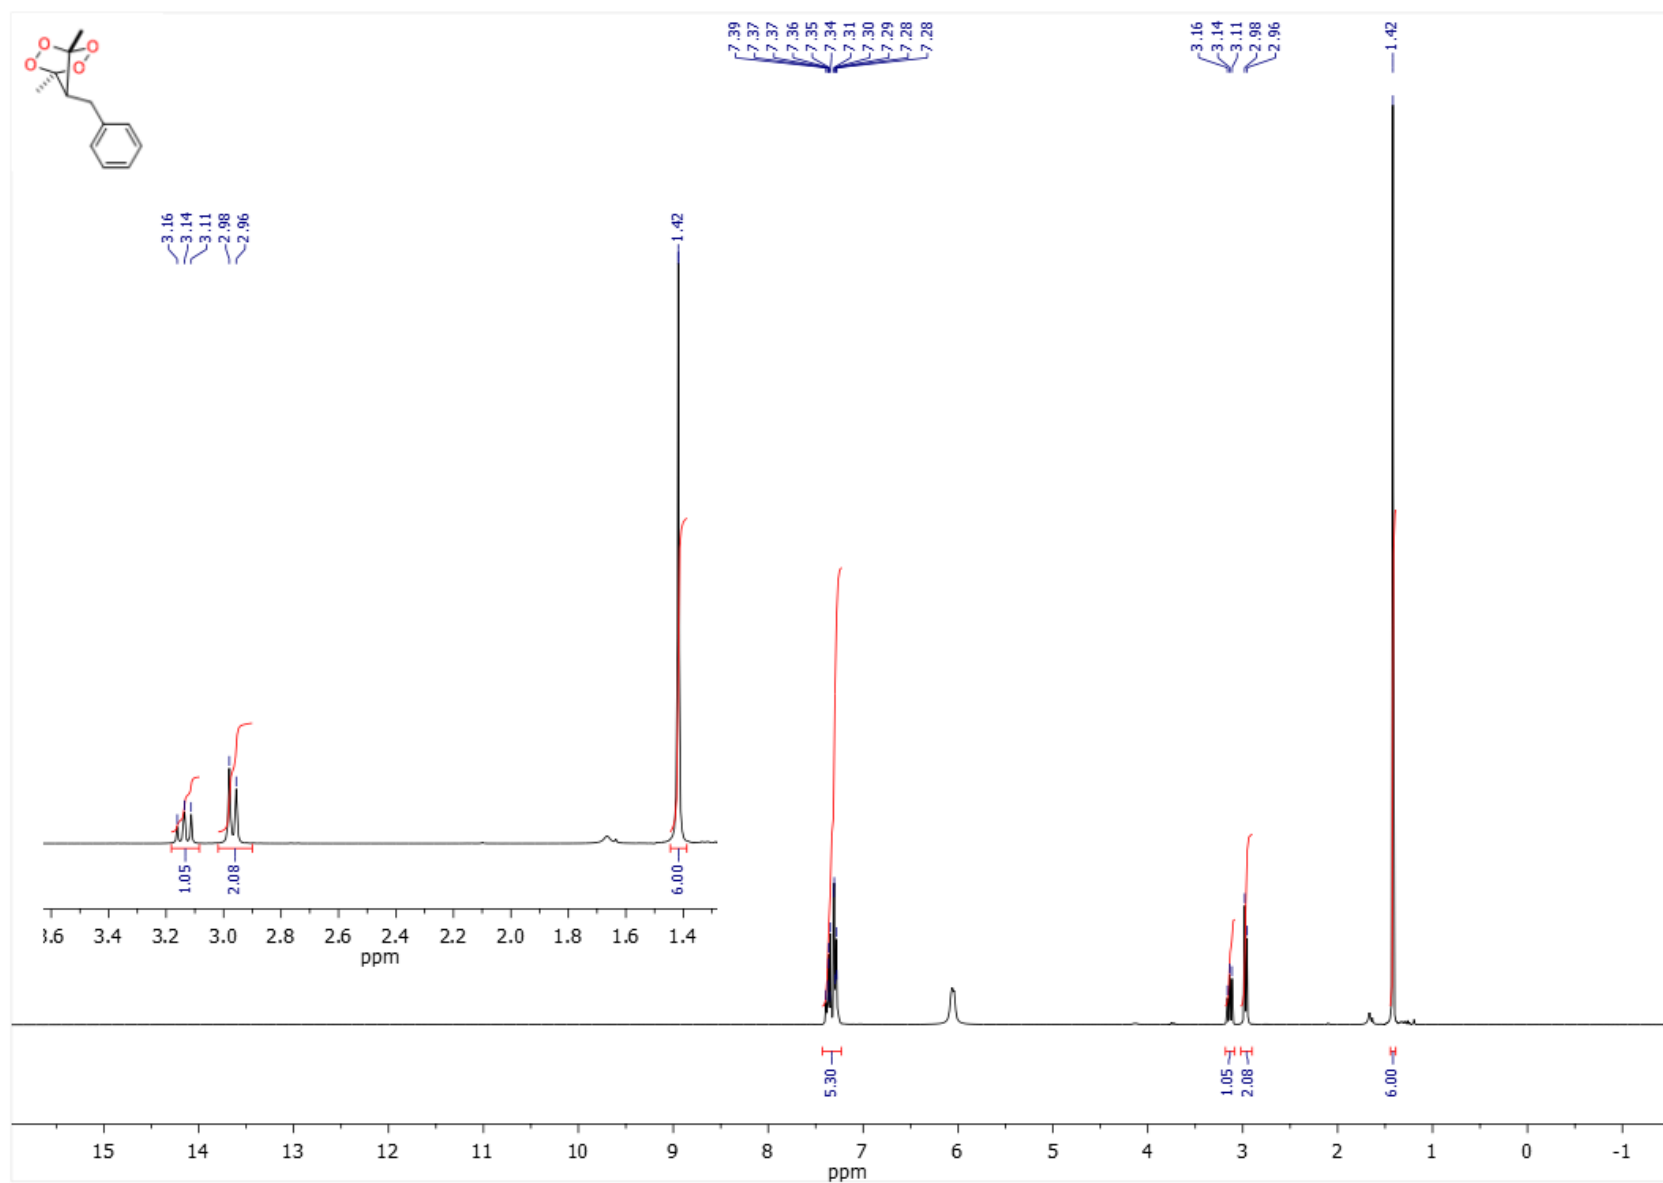

<sup>13</sup>C NMR (75.48 MHz, CDCl<sub>3</sub>). 7-benzyl-1,4-dimethyl-2,3,5,6-tetraoxabicyclo[2.2.1]heptane, P8

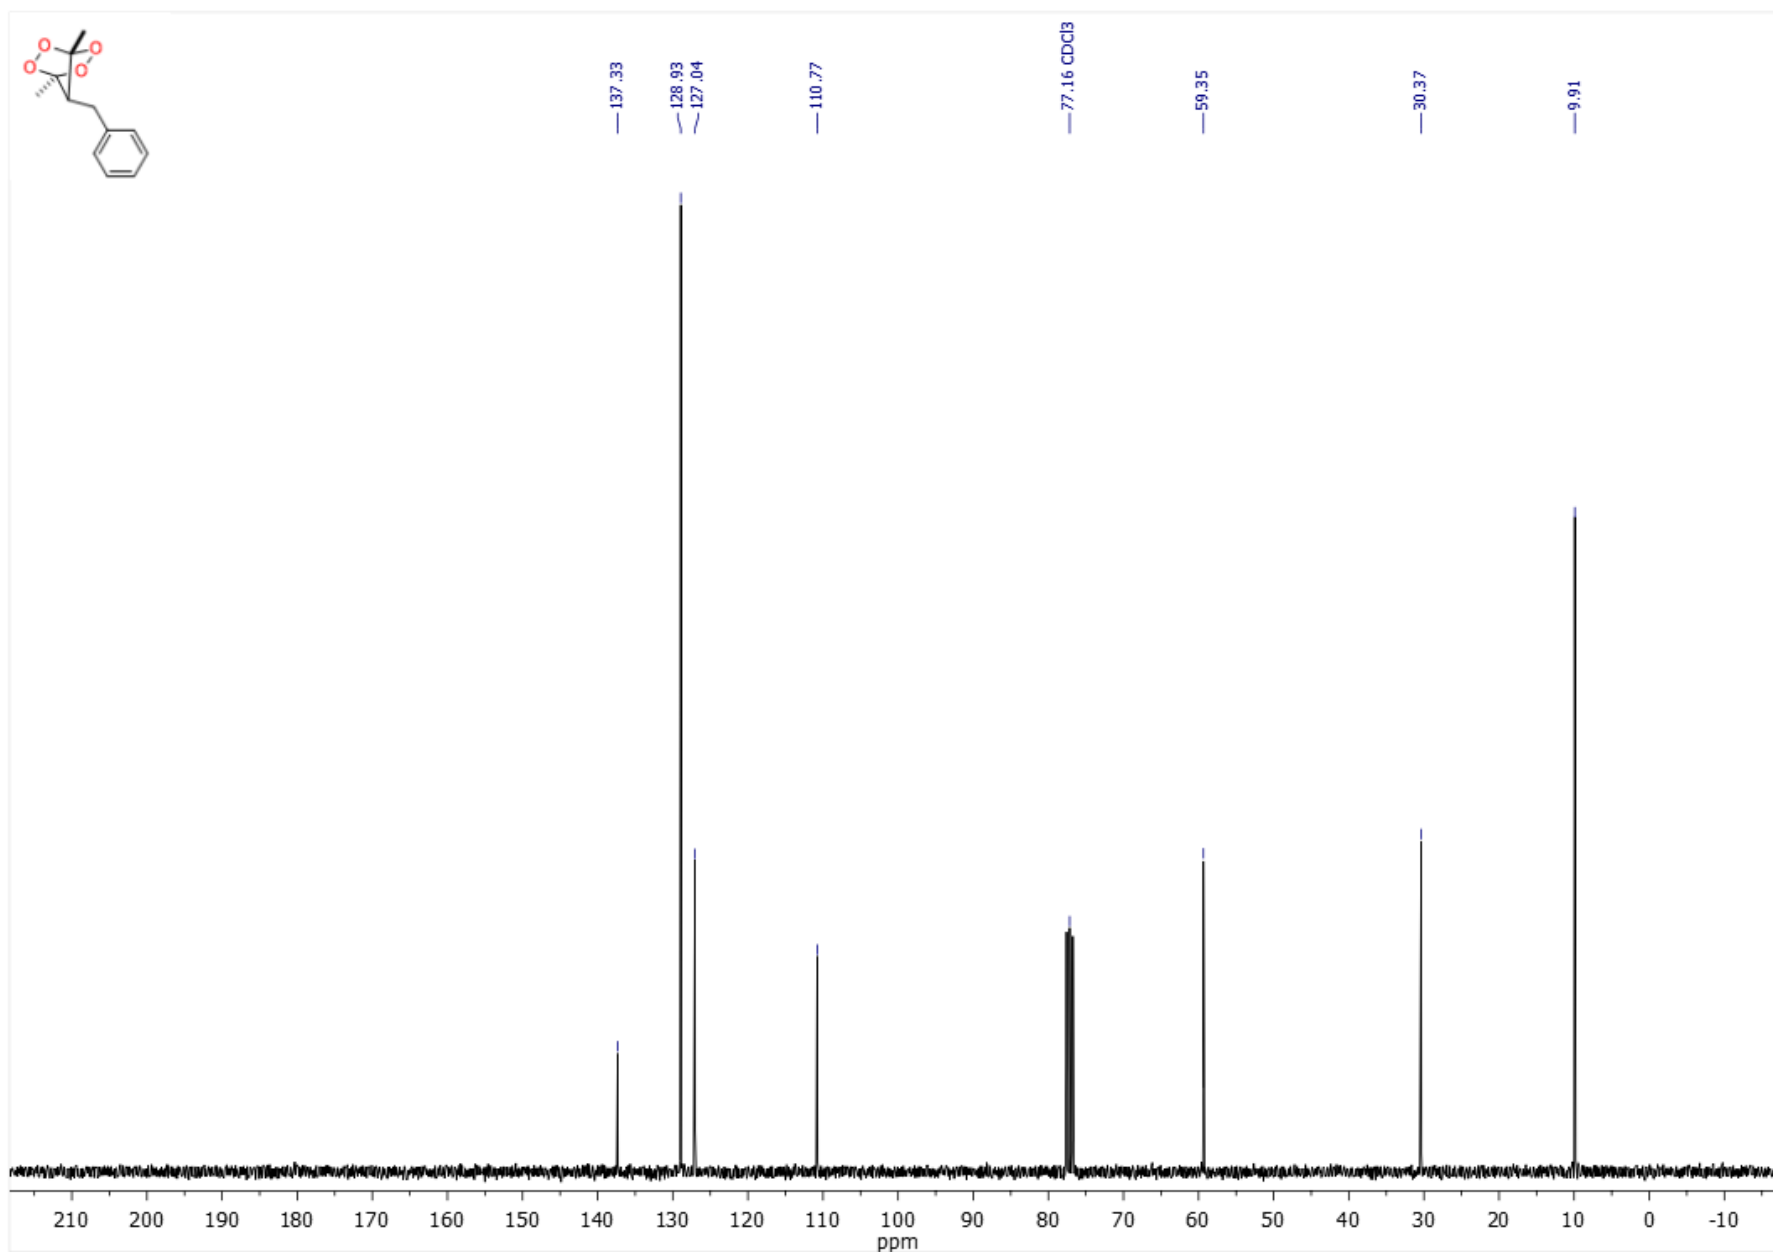

<sup>1</sup>H NMR (300.13 MHz, CDCl<sub>3</sub>). 4-(1-Adamantyl)-1-methyl-2,3,5,6-tetraoxabicyclo- [2.2.1]heptane, P9

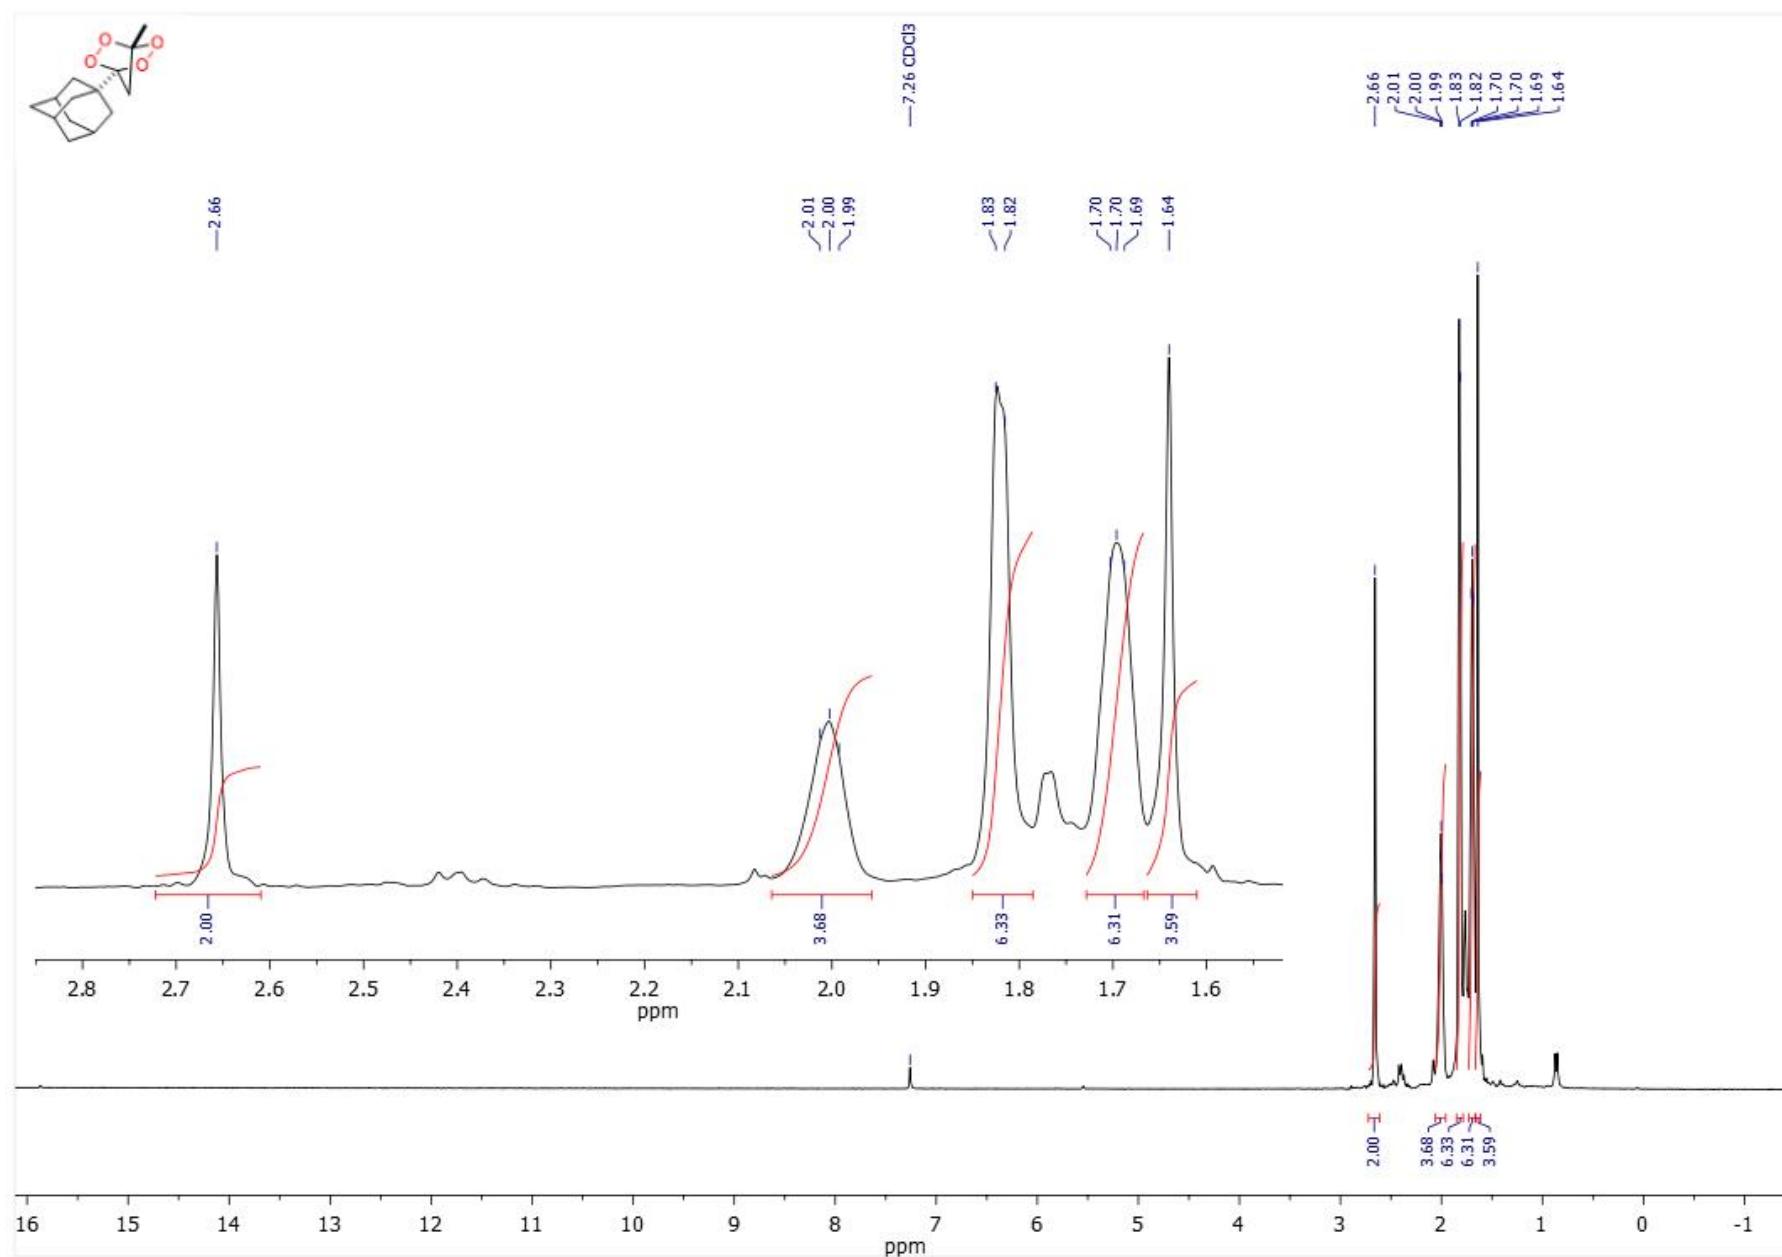

<sup>13</sup>C NMR (75.48 MHz, CDCl<sub>3</sub>). 4-(1-Adamantyl)-1-methyl-2,3,5,6-tetraoxabicyclo- [2.2.1]heptane, P9

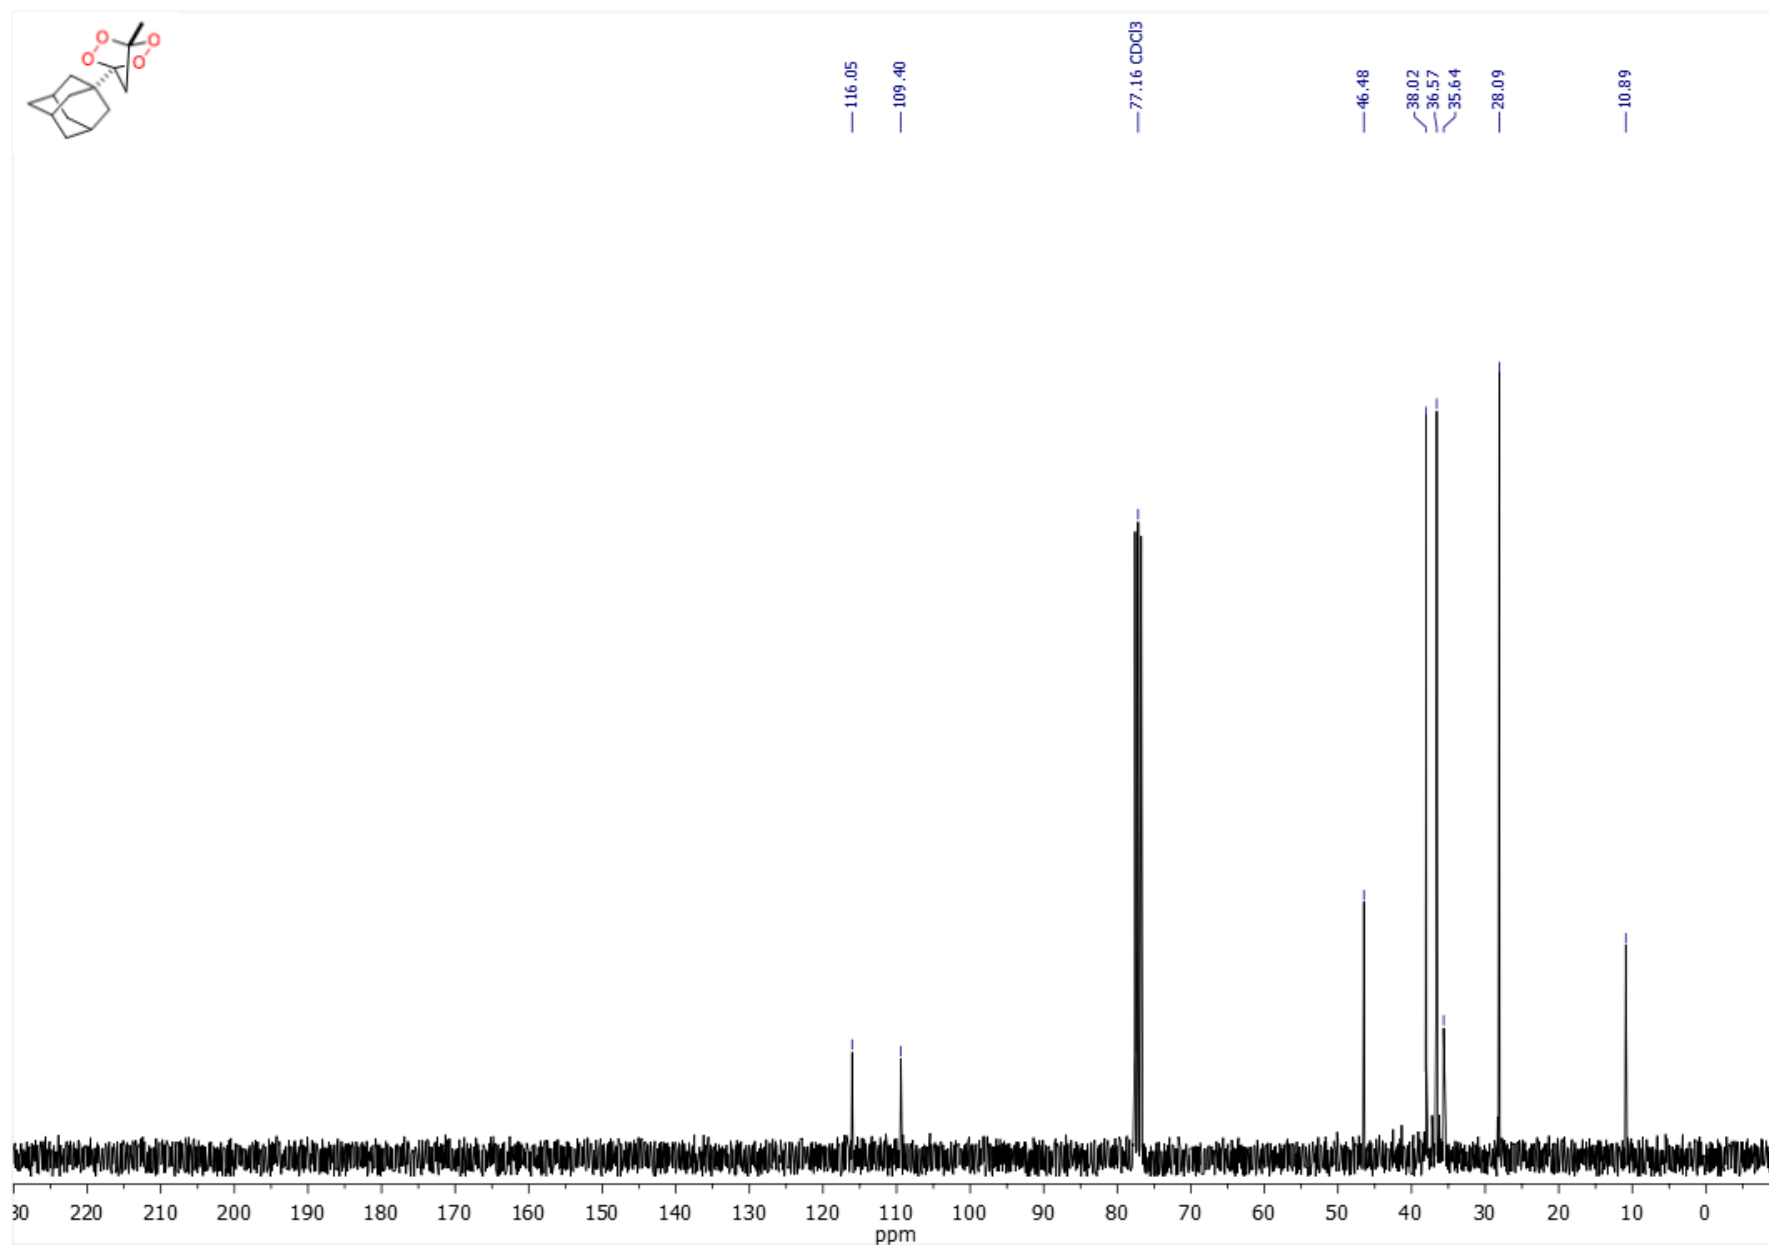

<sup>1</sup>H NMR (300.13 MHz, CDCl<sub>3</sub>). 4-(1-Adamantyl)-1-ethyl-2,3,5,6-tetraoxabicyclo[2.2.1]-heptane, P10

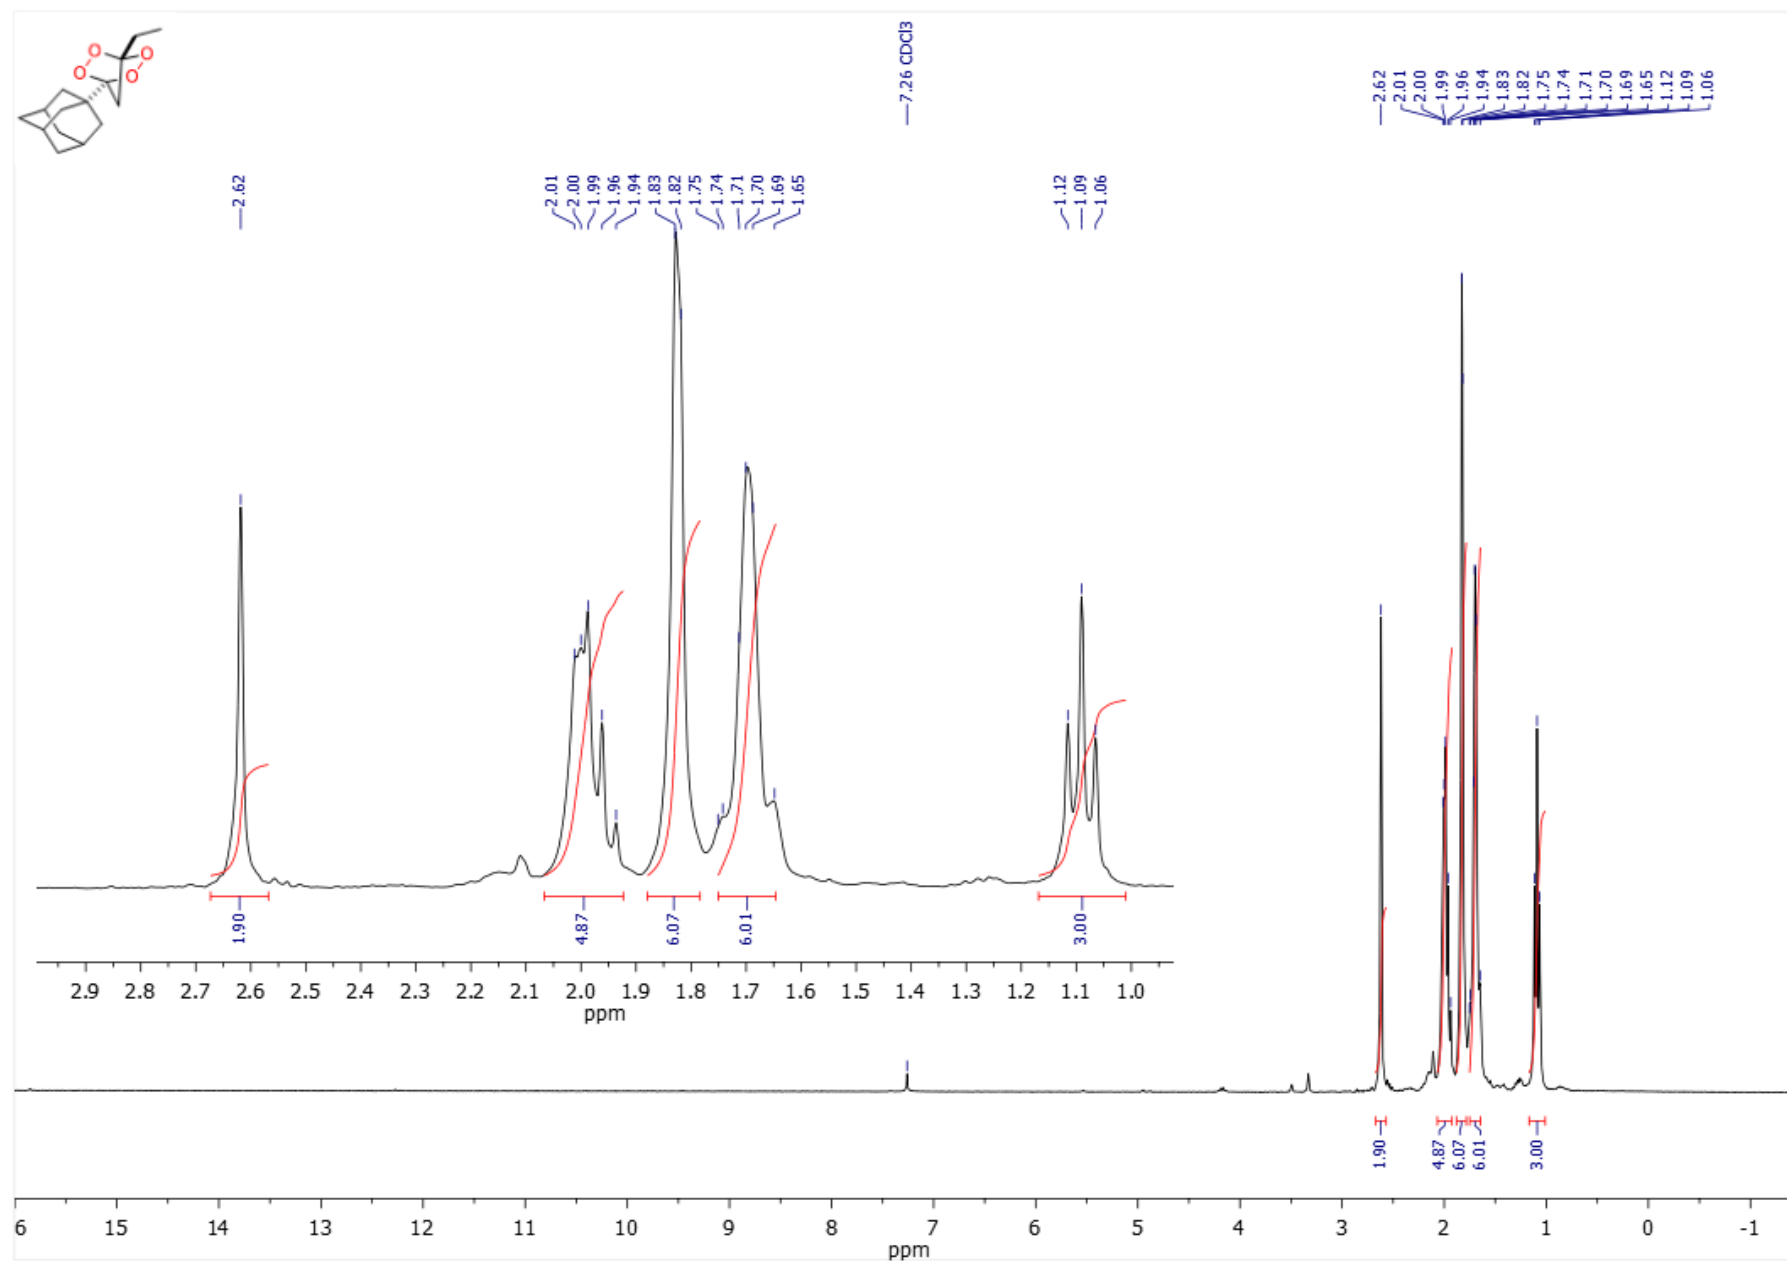

<sup>13</sup>C NMR (75.48 MHz, CDCl<sub>3</sub>). 4-(1-Adamantyl)-1-ethyl-2,3,5,6-tetraoxabicyclo[2.2.1]-heptane, P10

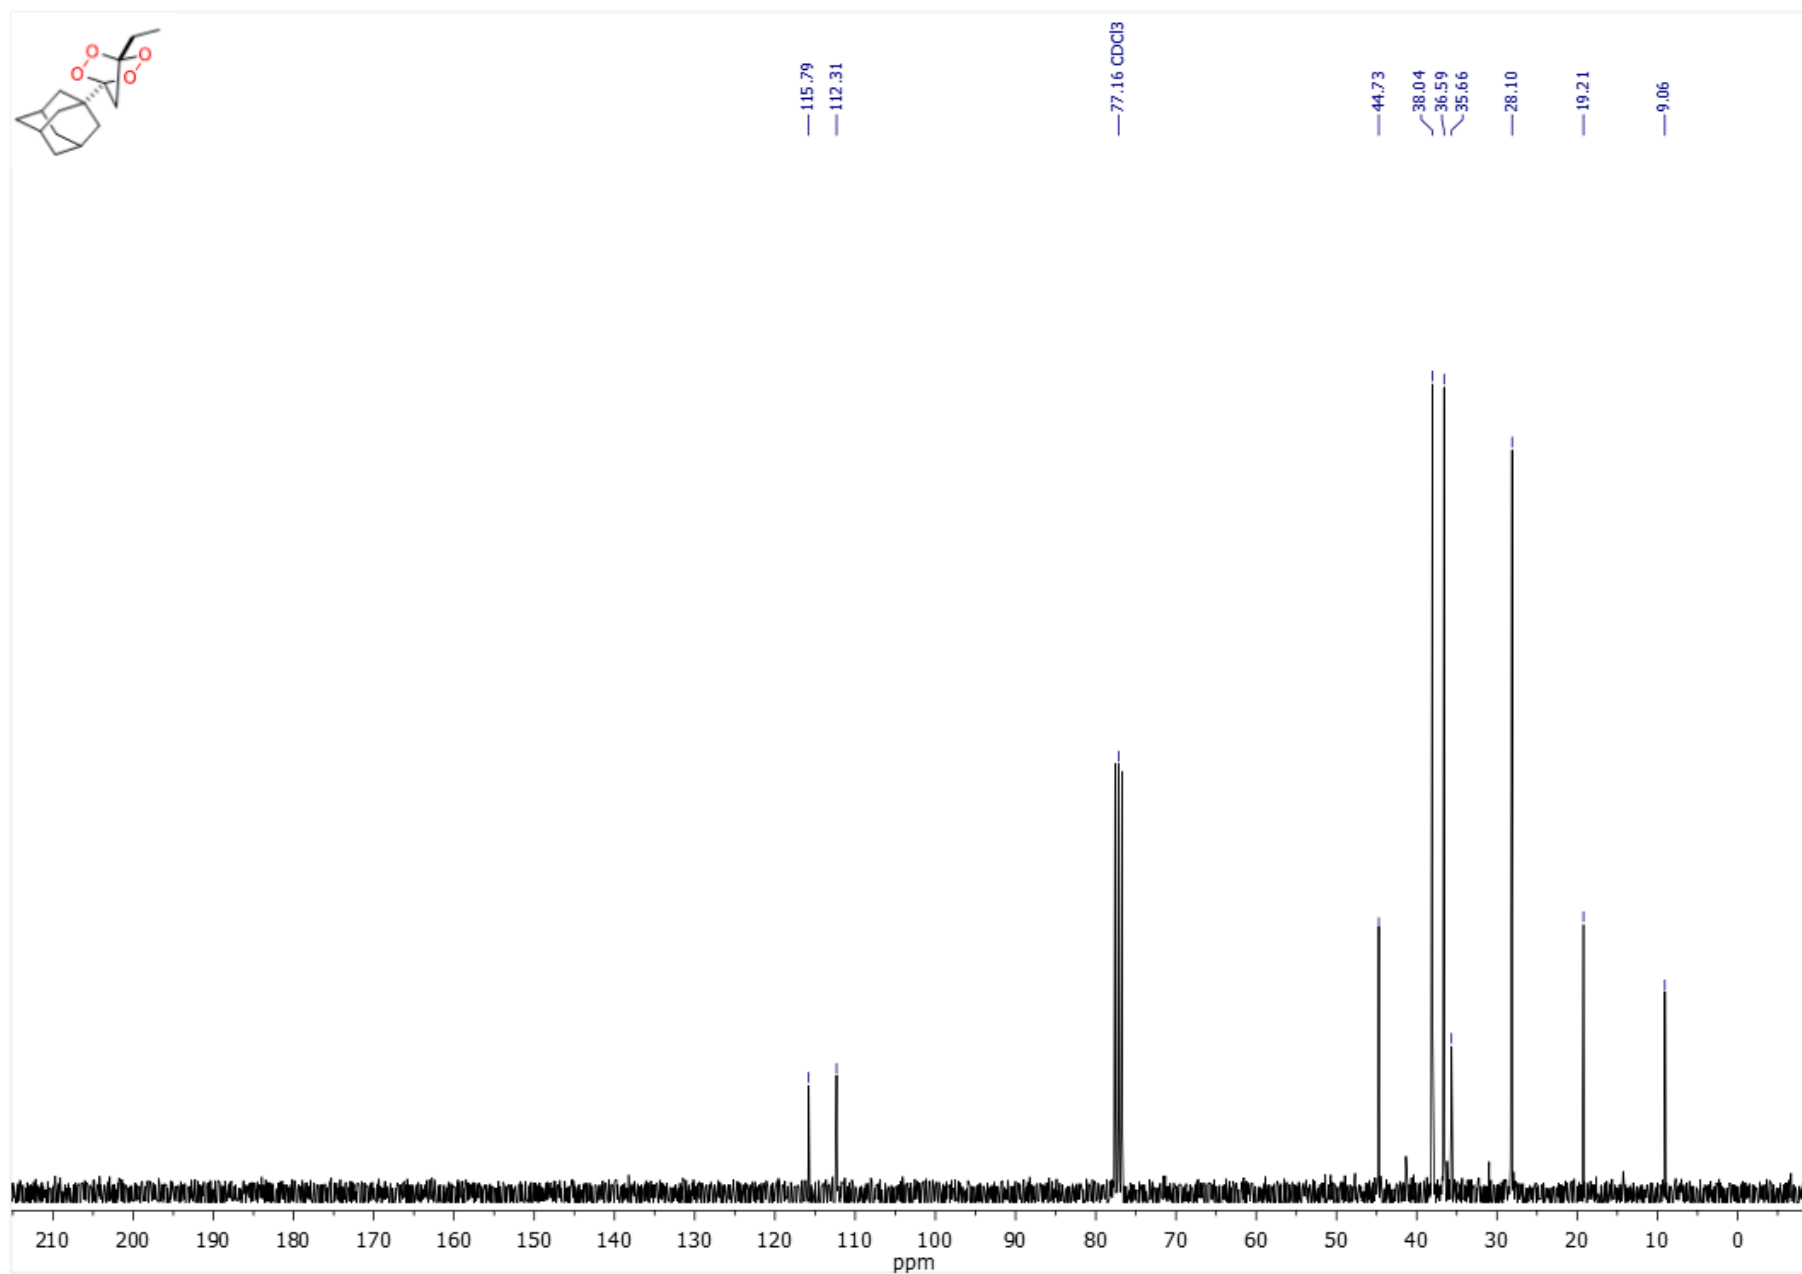

<sup>1</sup>H NMR (300.13 MHz, CDCl<sub>3</sub>). 3a-Butyl-3,6,7a-trimethyltetrahydro-3H,4H-3,6-epoxy[1,2]- dioxolo[3,4-b]pyran, P11

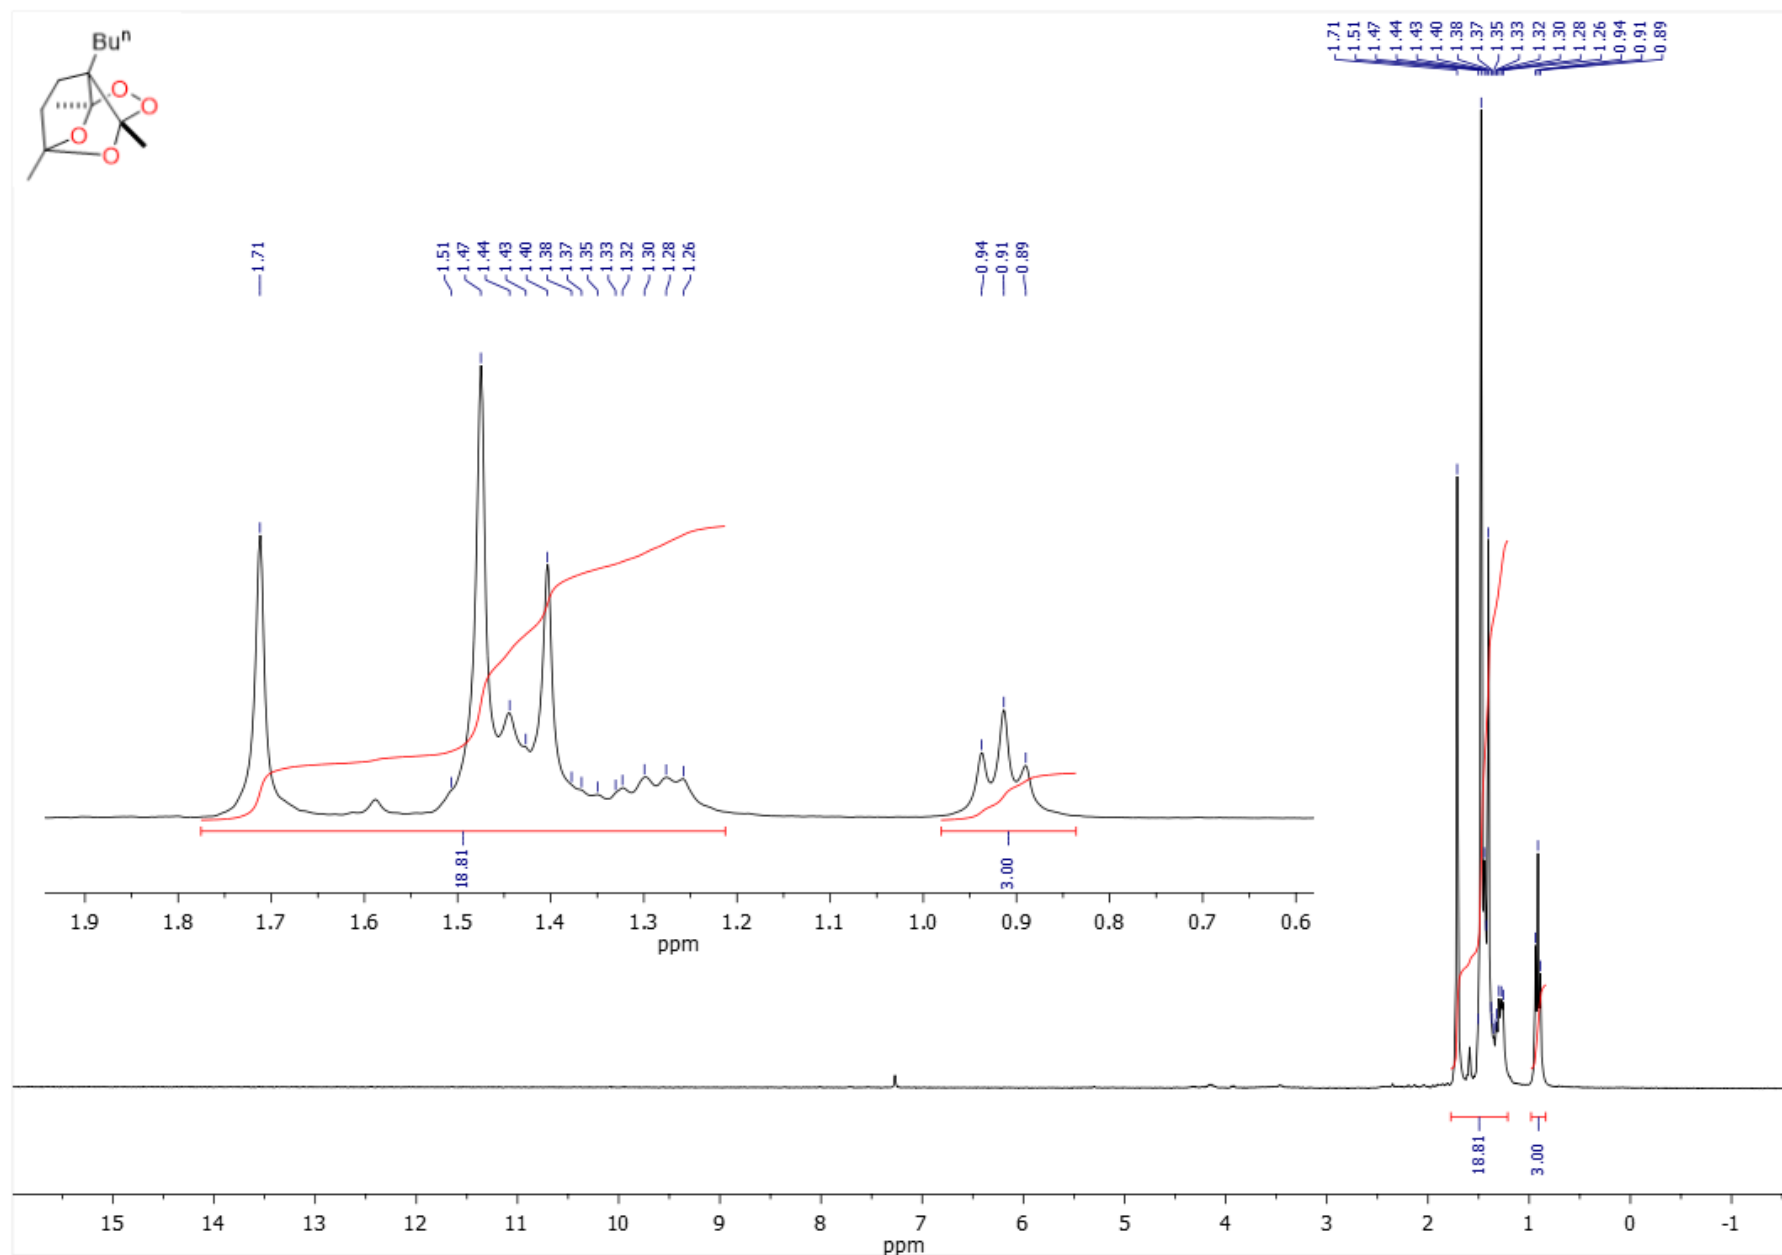



$^{13}\text{C}$  NMR (75.48 MHz,  $\text{CDCl}_3$ ). 3a-Butyl-3,6,7a-trimethyltetrahydro-3H,4H-3,6-epoxy[1,2]-dioxolo[3,4-b]pyran, P11

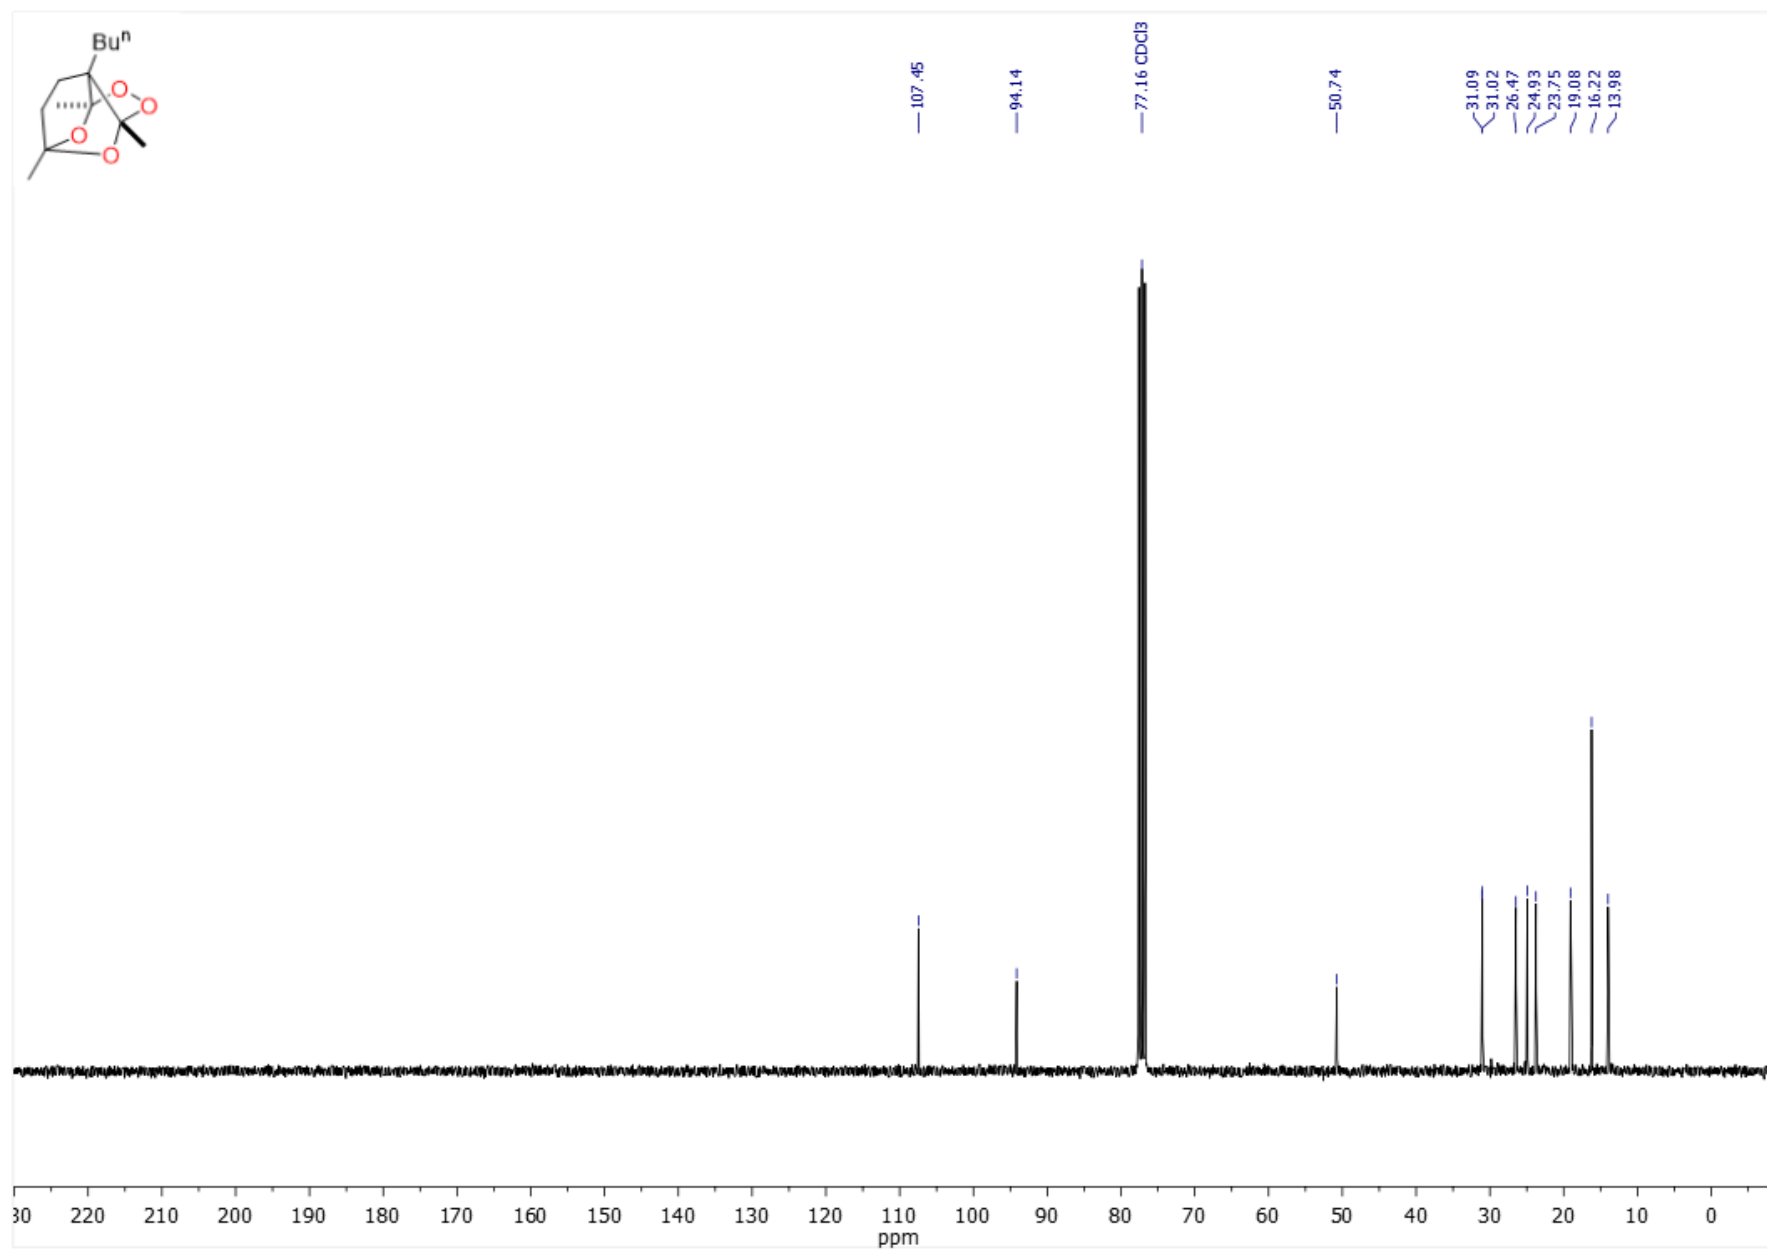

<sup>1</sup>H NMR (300.13 MHz, CDCl<sub>3</sub>). 3a-Allyl-3,6,7a-trimethyltetrahydro-3H,4H-3,6-epoxy[1,2]- dioxolo[3,4-b]pyran, P12

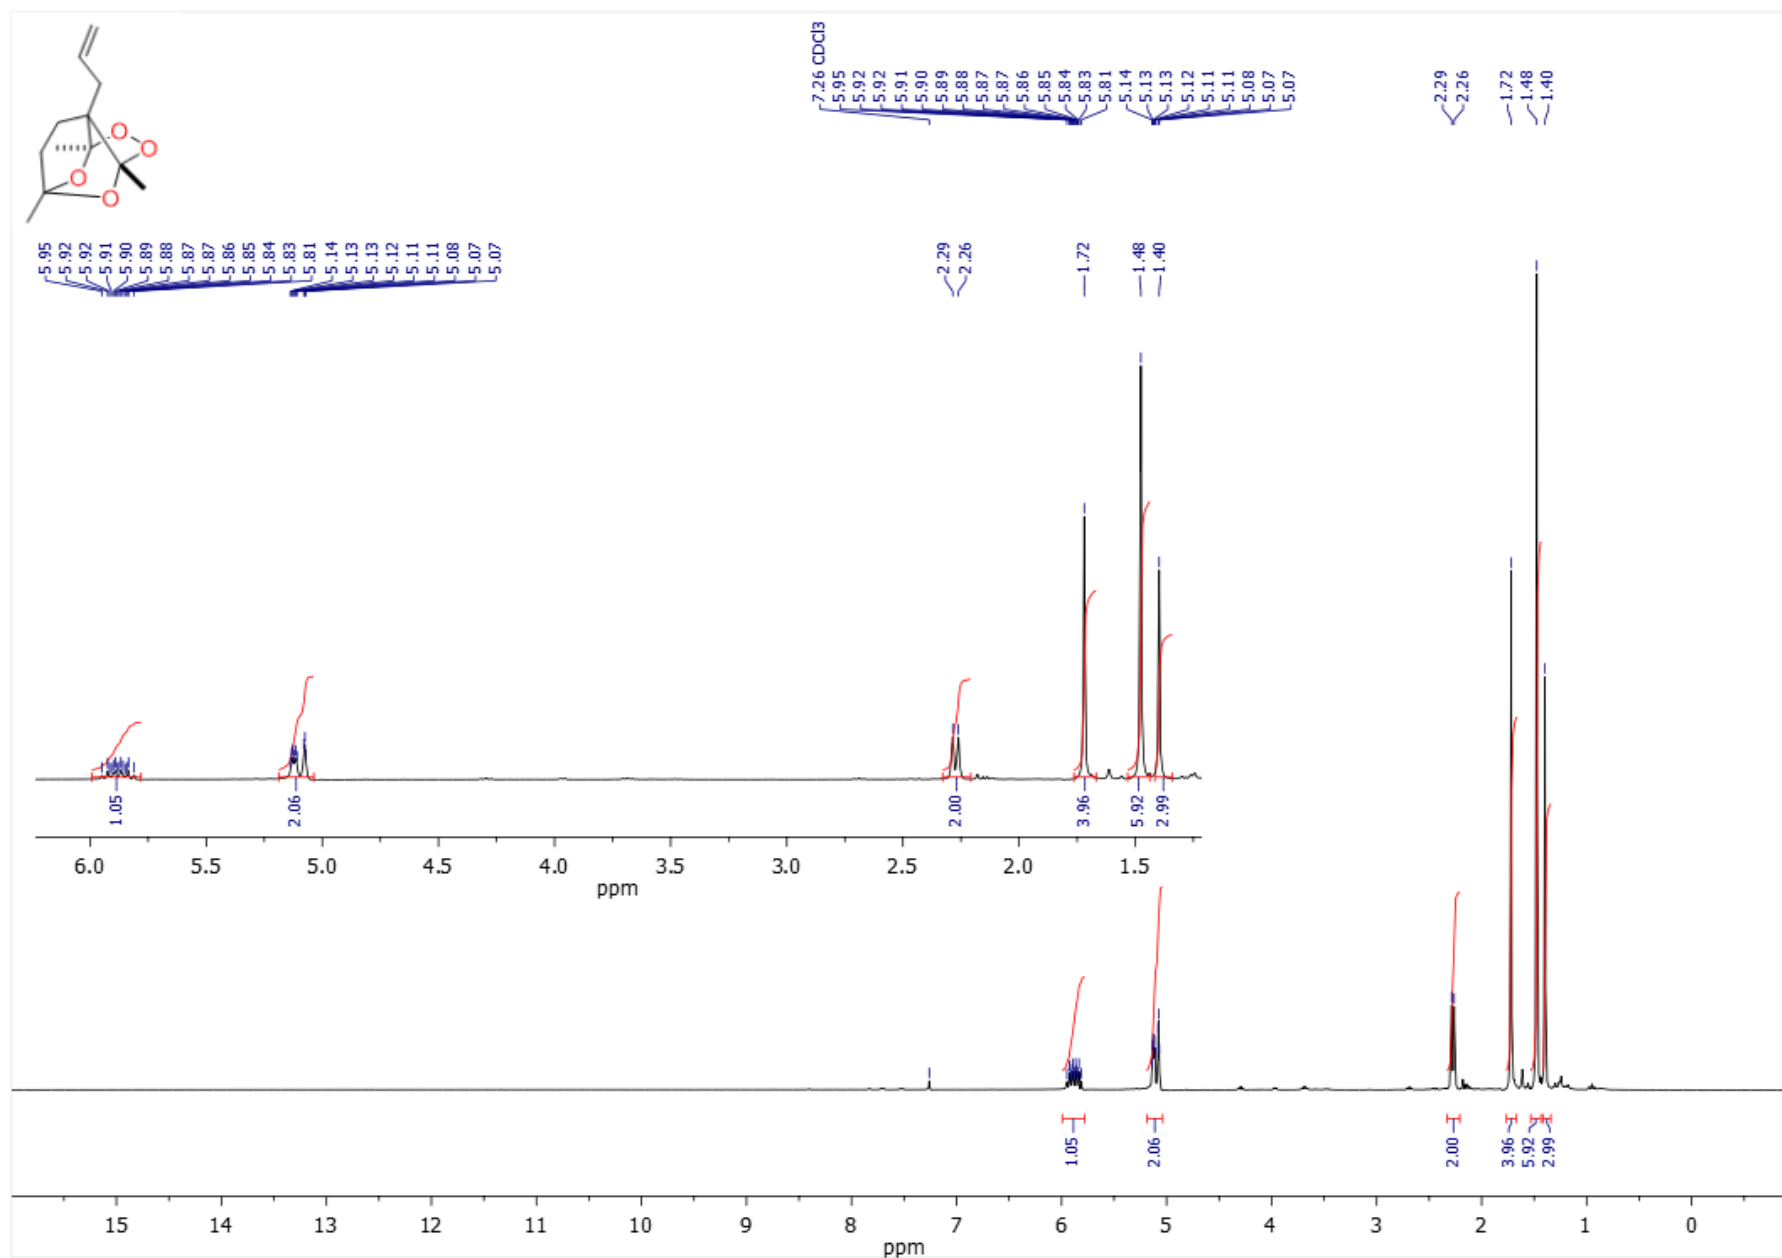

<sup>13</sup>C NMR (75.48 MHz, CDCl<sub>3</sub>). 3a-Allyl-3,6,7a-trimethyltetrahydro-3H,4H-3,6-epoxy[1,2]- dioxolo[3,4-b]pyran, P12

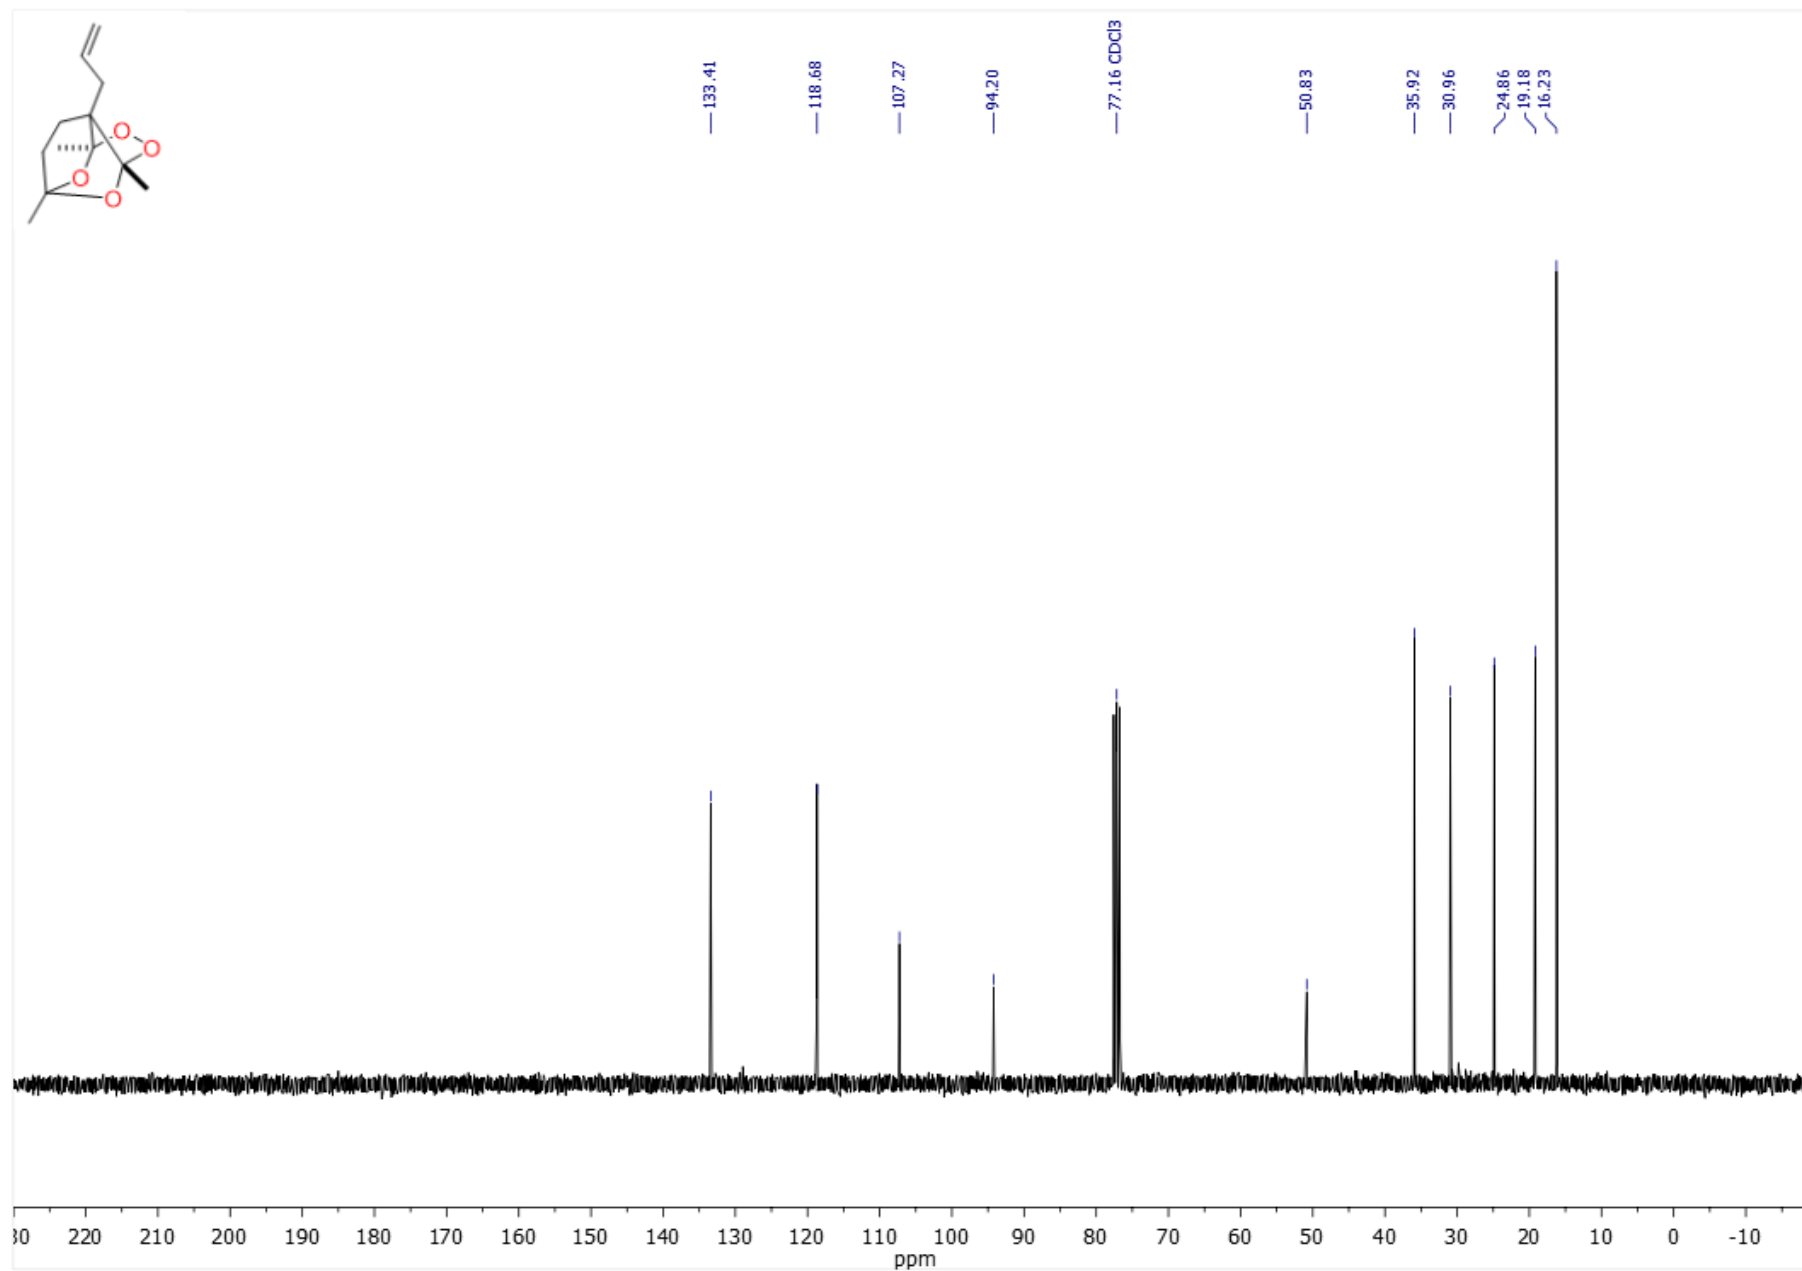

<sup>1</sup>H NMR (300.13 MHz, CDCl<sub>3</sub>). 3a-benzyl-3,6,7a-trimethyltetrahydro-3H,4H-3,6-epoxy[1,2]dioxolo[3,4-b]pyran, P13

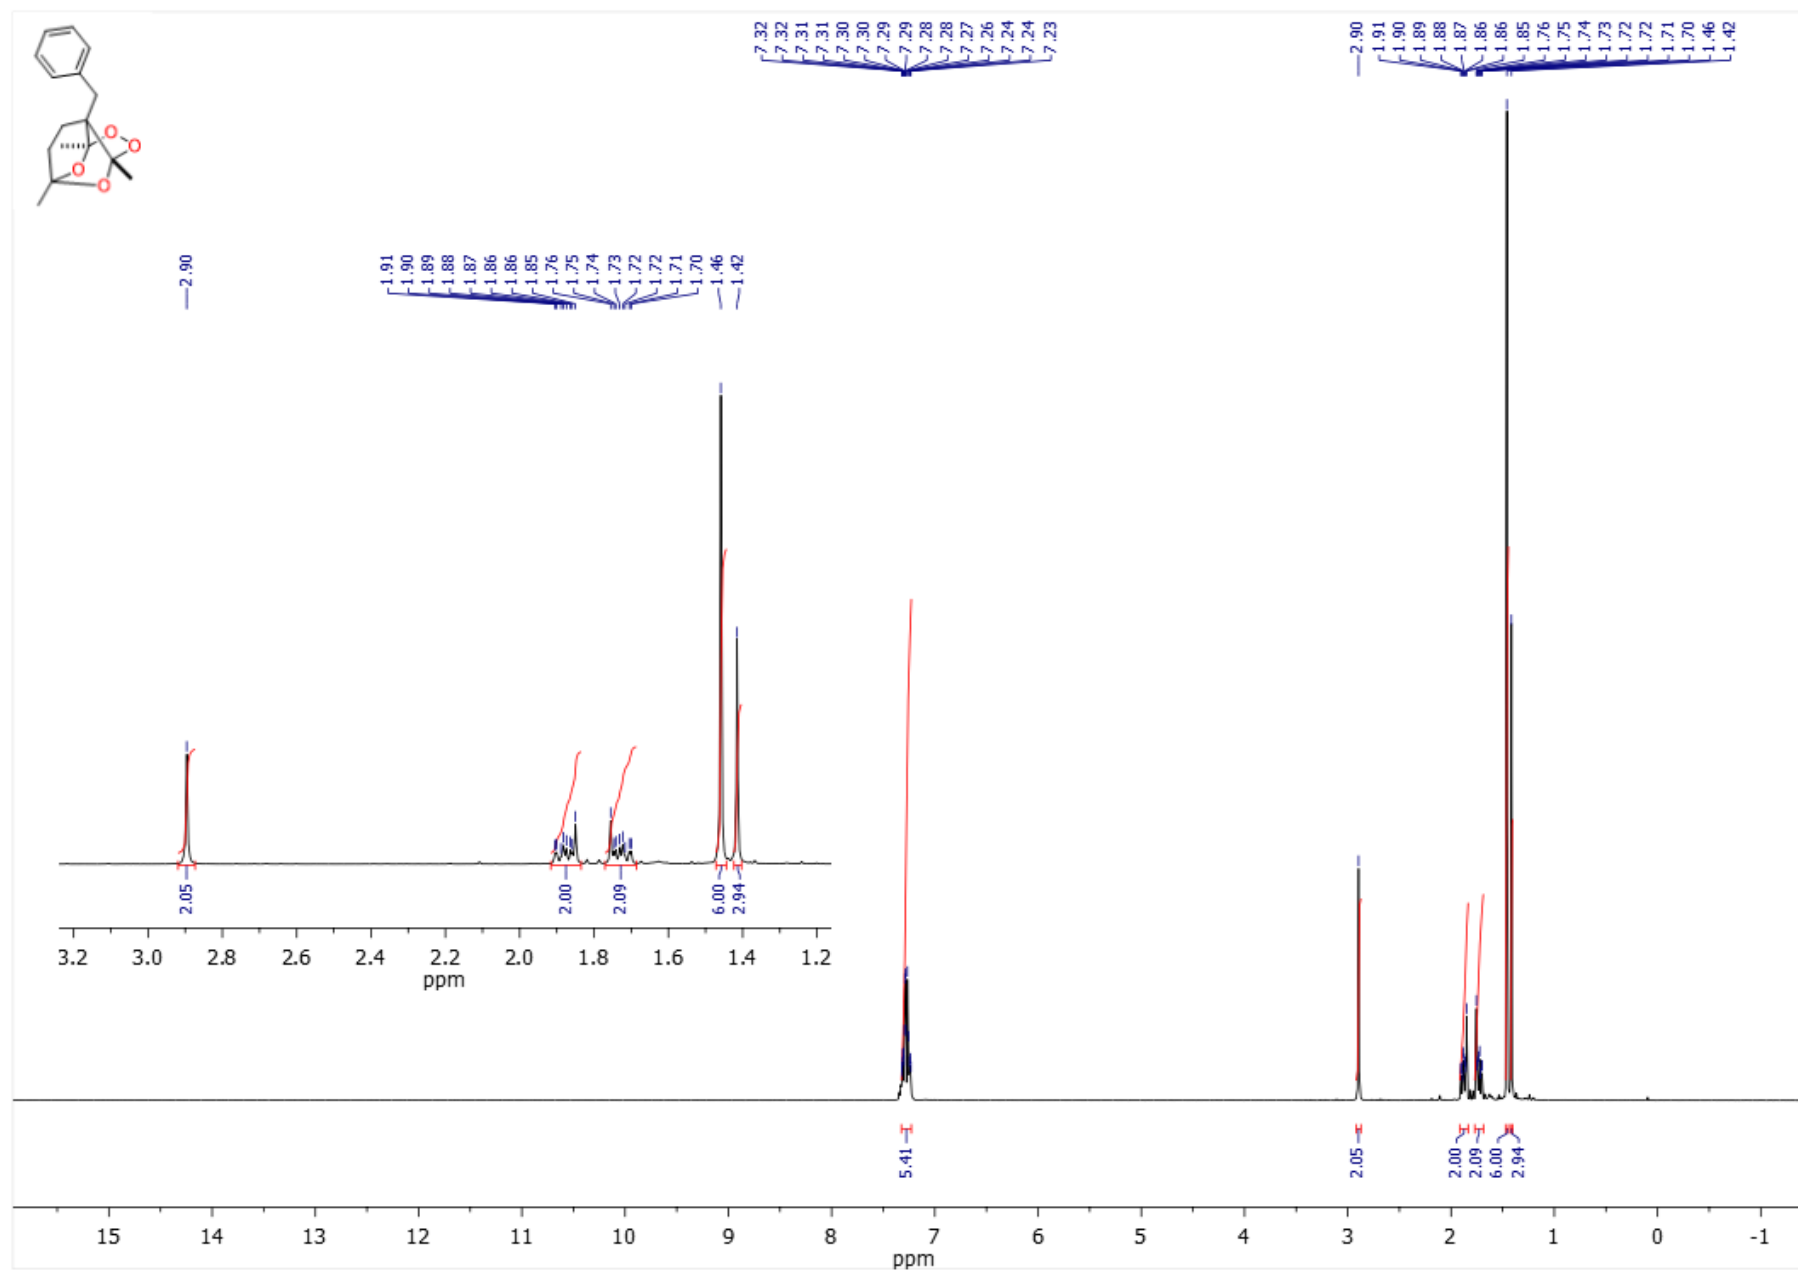

<sup>13</sup>C NMR (75.48 MHz, CDCl<sub>3</sub>). 3a-benzyl-3,6,7a-trimethyltetrahydro-3H,4H-3,6-epoxy[1,2]dioxolo[3,4-b]pyran, P13

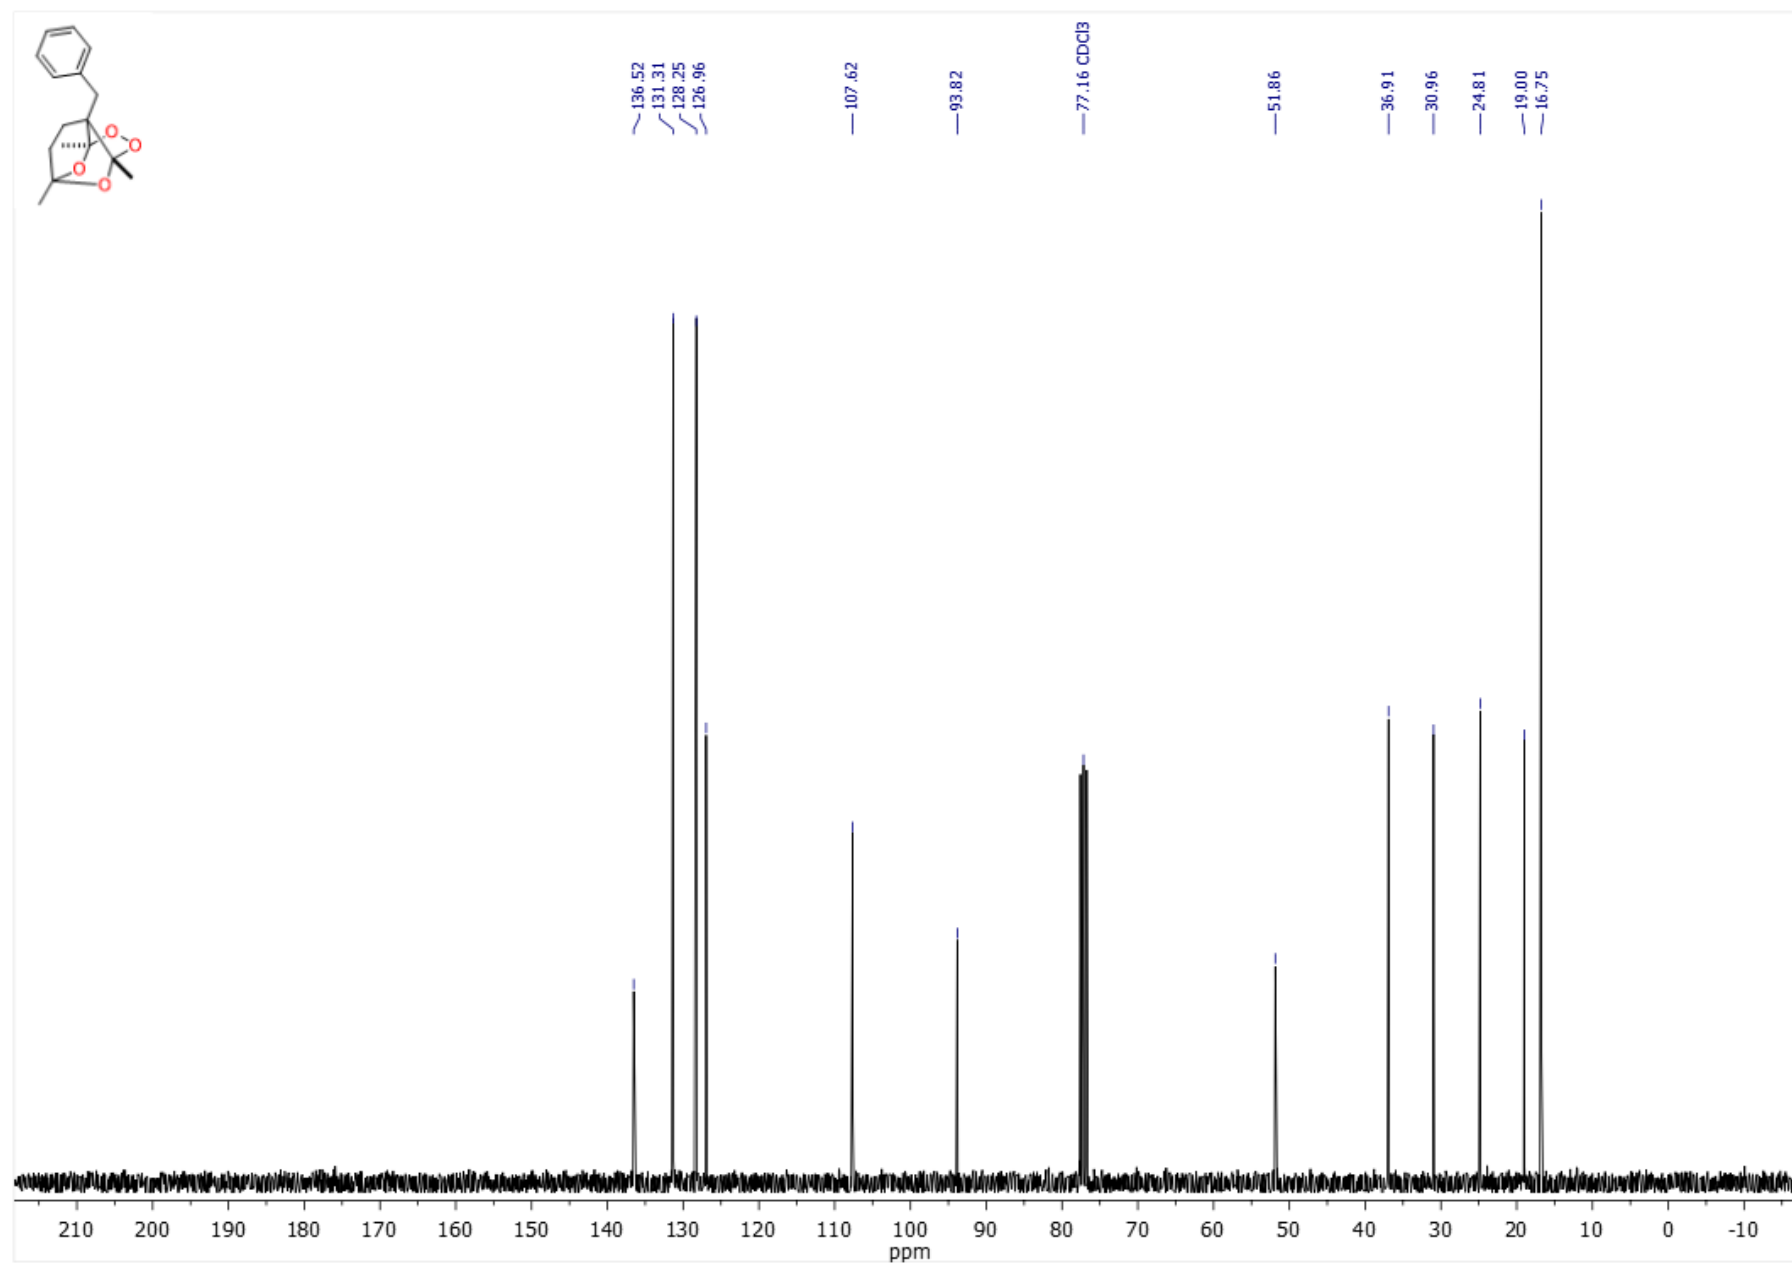

Supplement: s1 [file s1]
